# Supplementary material
Source: Research Square preprint supplement (doi:10.21203/rs.3.rs-9963675/v1)
Supplement: Supplementary file 1 [file 0c22b2653354ca8d08455eac.pdf]

**S-Figure 3 | 2024 renewable status and decarbonization maturity**

**a**

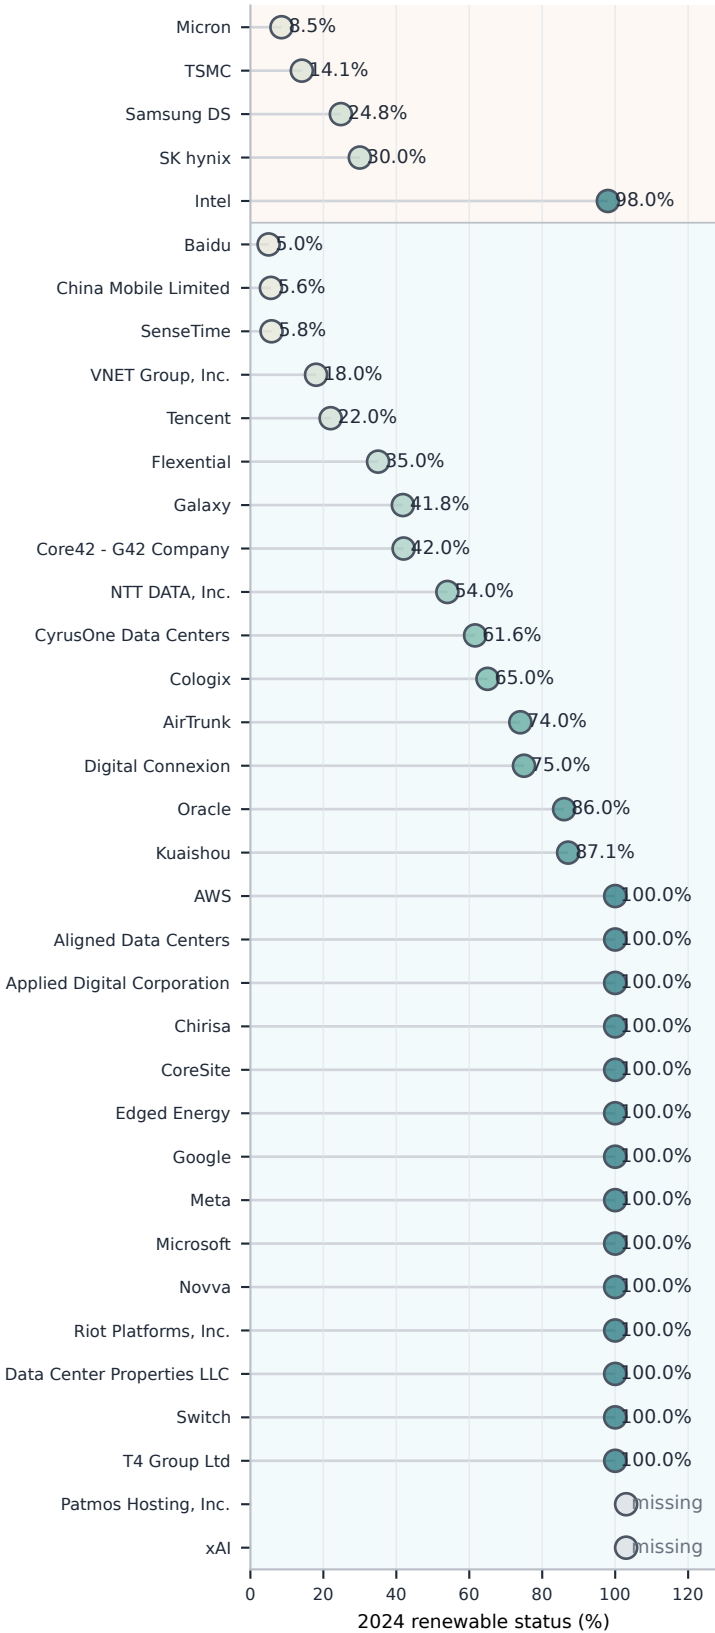

**b**

|     |         |         |         |
|-----|---------|---------|---------|
| no  | no      | unclear | partial |
| no  | partial | unclear | partial |
| no  | no      | unclear | partial |
| no  | partial | unclear | partial |
| no  | full    | unclear | partial |
| no  | full    | unclear | partial |
| no  | no      | unclear | partial |
| no  | full    | unclear | partial |
| no  | full    | yes     | partial |
| no  | no      | unclear | partial |
| no  | no      | unclear | partial |
| no  | full    | yes     | partial |
| no  | partial | unclear | partial |
| no  | full    | unclear | partial |
| no  | full    | unclear | partial |
| no  | partial | unclear | partial |
| yes | partial | unclear | yes     |
| no  | no      | unclear | partial |
| yes | full    | unclear | yes     |
| yes | full    | unclear | yes     |
| yes | no      | unclear | yes     |
| yes | no      | unclear | yes     |
| yes | partial | unclear | yes     |
| yes | partial | unclear | yes     |
| yes | full    | yes     | yes     |
| yes | full    | yes     | yes     |
| yes | full    | unclear | yes     |
| yes | no      | unclear | yes     |
| yes | no      | unclear | yes     |
| yes | full    | unclear | yes     |
| yes | full    | unclear | yes     |
| yes | no      | unclear | yes     |
| no  | no      | unclear | unclear |
| no  | no      | unclear | unclear |

annual or hourly matching  
 2030 commitment  
 value-chain / supply-chain  
 verified clean-electricity path
