# Supplementary material
Source: Research Square preprint supplement (doi:10.21203/rs.3.rs-9963675/v1)
Supplement: Supplementary file 2 [file df5cb1afc82beddc7c0e04e0.xlsx]

## Sheet: S0_appendix_index
Sheet	Purpose
S1_evidence_notes	Consolidated external source notes used by appendix inputs; evidence class retained.
S2_main_results_2024	Main 2024 low/central/high emissions estimates.
S3_corporate_MB_inputs	Supplier and operator electricity/emissions inputs.
S4_mfg_supplier_inputs	Manufacturing supplier Scope 1/2 and renewable-electricity inputs.
S5_module_inputs	Module mass and greenhouse-gas input ranges.
S6_module_supplier_mapping	Module-to-supplier allocation weights and unresolved shares.
S7_mfg_contribution_summary	Supplier and module manufacturing contribution summaries.
S8_operator_screening	Source-supported operator inclusion table for the AI data-centre operations dataset.
S9_facility_summary	Facility-level activity and emissions data.
S10_crosscheck_sensitivity	Sensitivity and cross-check result values.

## Sheet: S1_evidence_notes
Source note	Evidence class	Source title	Source URL	Source location	Source data used
Intel supplier disclosure source	Tier A - supplier Scope 2 / renewable-electricity disclosure-derived evidence	Intel 2024-25 Corporate Responsibility Report	https://csrreportbuilder.intel.com/pdfbuilder/pdfs/CSR-2024-25-Full-Report.pdf	PDF p.36: 2024 Scope 2 market-based and location-based emissions. PDF p.37: 2024 renewable-electricity progress. PDF p.58: renewable-electricity share and total energy-use summary.	PDF p.36 reports Scope 2 (Indirect, Electricity) of 97,000 tCO2e as market-based Scope 2 and location-based Scope 2 of 3,179,000 tCO2e/year. PDF p.37 reports 98% global renewable electricity as of the end of 2024. PDF p.58 repeats 98% renewable electricity and lists 2024 energy use of 11.4 billion kWh, including electricity, gas and diesel.
Micron supplier disclosure source	Tier A - supplier Scope 2 / renewable-electricity disclosure-derived evidence	Micron Sustainability Report	https://www.micron.com/content/dam/micron/educatorhub/sustainability/micron-2025-sustainability-report.pdf | https://www.idahopower.com/about-us/planning-for-the-future/integrated-resource-plan/	PDF p.31: Black Mesa solar PPA context. PDF p.75: FY24 total energy and grid-electricity percentage. PDF p.80: purchased renewable electricity, onsite renewable electricity, total energy and grid-electricity share. PDF p.81: Scope 2 market-based emissions.	PDF p.75 reports FY24 total energy consumed of 11,792,797 MWh and grid electricity of 78%. PDF p.80 reports purchased renewable electricity of 783,604 MWh, onsite renewable electricity of 270 MWh, total energy consumption of 11,792,797 MWh and grid electricity consumed of 78%. PDF p.81 reports Scope 2 market-based emissions of 4,002,529 MTCO2-e.
SK hynix supplier disclosure source	Tier A - supplier Scope 2 / renewable-electricity disclosure-derived evidence	SK hynix Sustainability Report	https://www.skhynix.com/sustainability/UI-FR-SA1601/	PDF p.20: 2024 renewable-electricity share narrative. PDF p.72: Scope 1, location-based Scope 2 and PRISM market-based Scope 1+2 emissions. PDF p.73: total electricity consumption and renewable-electricity consumption.	PDF p.20 reports that SK hynix sourced 29.9% of electricity used at global production sites from renewable electricity in 2024. PDF p.72 reports 2024 Scope 1 total of 3,762,584 tCO2e, location-based Scope 2 total of 3,812,119 tCO2e and PRISM market-based Scope 1+2 of 5,502,136 tCO2e. PDF p.73 reports total electricity consumption of 12,620 GWh and renewable-electricity consumption of 3,779 GWh, w…
Samsung DS supplier disclosure source	Tier A - supplier Scope 2 / renewable-electricity disclosure-derived evidence	Samsung Electronics 2025 Sustainability Report	https://csr.samsung.com/data/Sustainability_report_2025_en.pdf	PDF p.21: DS environmental target progress. PDF p.25: DS renewable-energy transition rate and renewable-energy usage. PDF p.72: DS Scope 2 emissions. PDF p.73: DS electricity consumption and renewable-energy consumption.	PDF p.21 reports a DS renewable-energy transition rate of 24.8%. PDF p.25 reports DS RE Transition of 24.8% and RE Usage of 7,184 GWh. PDF p.72 reports DS indirect Scope 2 emissions of 10,058 thousand tCO2e. PDF p.73 reports DS electricity consumption of 28,996 GWh and renewable-energy consumption of 7,184 GWh.
TSMC supplier disclosure source	Tier A - supplier Scope 2 / renewable-electricity disclosure-derived evidence	TSMC 2024 Sustainability Report	https://esg.tsmc.com/download/csr/2024%20TSMC%20Sustainability%20Report_E.pdf	PDF p.5: renewable-energy PPA capacity, renewable-energy use and renewable-energy use share. PDF p.14: 2024 Scope 2 emissions table and market-based Scope 2 reporting.	PDF p.5 reports renewable-energy PPAs totaling 4.4 GW, 3,610 GWh renewable-energy use and a 14.1% renewable-energy use share. PDF p.14 reports 2024 Scope 2 emissions of 10,926,644 tCO2e for the parent company and 30,753 tCO2e for VisEra; Source identifies the reported Scope 2 values as market-based.
Dell XE9680 / NVIDIA HGX H100 product-boundary and PCF source	Tier B/C - consolidated product-boundary and PCF evidence bundle	Dell XE9680 / NVIDIA HGX H100 product-boundary and PCF source bundle	https://images.nvidia.com/aem-dam/Solutions/documents/HGX-H100-PCF-Summary.pdf | https://www.delltechnologies.com/asset/en-us/products/servers/briefs-summaries/poweredge-xe9680.pdf	NVIDIA HGX H100 PCF Summary; Dell PowerEdge XE9680 product brief.	Boundary basis includes the fully populated XE9680 node envelope, dual-socket host boundary, HGX H100 baseboard, HBM, thermal/component PCF lines, and visible server hardware as summarized in Appendix S5.
AirTrunk operator/facility source	Tier B - renewable-share or procurement evidence	AirTrunk Sustainability Report FY24	https://airtrunk.com/wp-content/uploads/2024/10/FY24-Sustainability-Report-by-AirTrunk.pdf	Planet > Energy Transition > Our Renewable Energy Profile, p.25; Appendix 1 sustainability data p.75 in FY25 report also restates FY24 value.	In FY24, the electricity consumption at our sites was matched 74% with renewable energy including both AirTrunk sourced renewables and confirmed customer matching. 47% renewable energy was through customer procurement and 27% renewable energy was via direct AirTrunk sourcing.
Aligned Data Centers operator/facility source	Tier B - renewable-share or procurement evidence	Aligned Data Centers sustainability page; Aligned press release	https://aligneddc.com/sustainability/ | https://aligneddc.com/aligned-energy-is-renewable/	Sustainability page > Scaling with Clean Power; Press release title/body, Feb. 26, 2020.	Aligned powers 100% of its operations with renewable energy across America. / 100% of Aligned’s Power Across All Data Centers is Renewable... ensuring that 100% of its power comes from certified renewable energy.
Amazon AWS operator/facility source	Tier B - renewable-share or procurement evidence	About Amazon renewable energy update; AWS Sustainability page	https://www.aboutamazon.com/news/sustainability/amazon-renewable-energy-goal/ | https://aws.amazon.com/sustainability/	About Amazon article title/body; AWS Sustainability > Transition to carbon-free energy.	All of the electricity consumed by Amazon’s operations, including its data centers, was matched with 100% renewable energy in 2023. / In 2024, Amazon signed 4 nuclear energy projects that will help power our data centers.
Applied Digital Corporation operator/facility source	Tier B - renewable-share or procurement evidence	Applied Digital FY2024 results; Applied Digital 'Different by Design' article	https://ir.applieddigital.com/news-events/press-releases/detail/105/applied-digital-reports-fiscal-fourth-quarter-and-full-year | https://www.applieddigital.com/insights/different-by-design-how-applied-digital-is-redefining-data-center-infrastructure	FY2024 results > Fiscal Fourth Quarter 2024 Financial and Operational Highlights; Different by Design article body; power-siting/renewable-resource context only.	Applied Digital... reported financial results for the fiscal fourth quarter and full year ended May 31, 2024. / By constructing data center campuses adjacent to power generation and renewable energy sources, such as wind farms...
Baidu Cloud operator/facility source	Tier B - renewable-share or procurement evidence	Baidu 2024 Environmental, Social and Governance Report	https://esgs.cdn.bcebos.com/2025/04/28/a2/39a2aaa4f728f4e2d0aebaff346c045e.pdf	Baidu 2024 ESG Report, Overview of ESG performance p.10; Environmental Stewardship > Data Center Energy Management p.82.	Renewable energy consumption 62.32 million kWh. / Share of renewable energy in total energy consumption in 2024: 5%. / We continue to increase the proportion of renewable energy used by our data centers.
China Mobile Limited operator/facility source	Tier B - renewable-share or procurement evidence	China Mobile Limited Sustainability Report 2024	https://www.chinamobileltd.com/en/ir/reports/ar2024/sd2024.pdf | https://www.chinamobileltd.com/en/esg/sd/2024/06.pdf | https://www.chinamobileltd.com/en/esg/sd/2024/08.pdf	Performance Report / Environmental Performance p.104; Green Development p.77.	Green electricity purchase volume ... 2024 35.37 [100 million kWh]. / Purchased electricity consumption ... 2024 629.3 [100 million kWh]. / The annual green power generation is 290 million kWh... purchased more than 3.5 billion kWh of green electricity.
Chirisa operator/facility source	Tier B - renewable-share or procurement evidence	Chirisa Technology Parks official site; Chirisa/Blue Owl/PowerHouse JV press release; Data Center Frontier / Power Systems Technology coverage	https://chirisatechnologyparks.com/ | https://chirisatechnologyparks.com/blue-owl-chirisa-technology-parks-and-powerhouse-data-centers-announce-next-phase-of-5-billion-joint-venture-development-partnership/ | https://www.datacenterfrontier.com/energy/article/55127752/coreweave-chirisa-illinois-data-center-project-taps-bloom-energy-for-fuel-cell-power-leans-into-microgrids | https://www.powersyste…	Official homepage > Our business; JV press release; article body July 2024. Project-level clean/low-carbon electricity context only.	We are committed to delivering high technology campuses that meet a variety of complex needs and generate a positive impact on the communities and environment in which they operate. / CoreWeave's new strategic partnership with Bloom Energy will utilize... fuel cells to generate on-site energy...
Cologix operator/facility source	Tier B - renewable-share or procurement evidence	Cologix 2024 ESG Report; Cologix 2024 ESG Report press release	https://cologix.com/wp-content/uploads/2025/07/Cologix_24ESG_Report_FA_070725-compressed.pdf | https://www.globenewswire.com/news-release/2025/07/30/3124212/0/en/Cologix-Releases-Annual-ESG-Report-Highlighting-Focus-on-Responsible-Growth-and-the-Importance-of-Connectivity.html	2024 ESG Report > Environment > Our Emissions Footprint, p.21; press release key highlights.	In 2024, we once again achieved high percentages of carbon-free energy across our footprint, with 65% carbon-free energy. / Cologix maintained 65% carbon-free energy use across its growing data center footprint.
Core42 - G42 Company operator/facility source	Tier B - renewable-share or procurement evidence	Dell customer story: Core42; G42/EcoCloud green-powered mega data center collaboration; Microsoft-G42 Kenya digital ecosystem initiative	https://www.dell.com/en-us/lp/customer-stories-core42 | https://www.g42.ai/resources/news/g42-and-kenyas-ecocloud-unveil-green-powered-mega-data-center-collaboration | https://news.microsoft.com/source/2024/05/22/microsoft-and-g42-announce-1-billion-comprehensive-digital-ecosystem-initiative-for-kenya/	Dell customer story > Impact section; G42 press release > EcoCloud-G42 Mega Data Center description; Microsoft Source press release, May 22, 2024. Project/prospective clean-energy context only.	Energy efficiency increased by 40 percent and scalability tripled, enabling management of more than 70 MW of power. / Strategically located in Kenya's geothermal-rich region, the EcoCloud-G42 Mega Data Center is planned to have initial capacity of 100 MW, but with the potential to build up to 1 Gigawatt. / Microsoft and G42 announced a comprehensive package of digital investments in Kenya.
CoreSite operator/facility source	Tier B - renewable-share or procurement evidence	CoreSite VA3 facility page; CoreSite sustainability press release; CoreSite REC product information; American Tower 2024 Sustainability Executive Report press release	https://www.coresite.com/data-center/va3-reston-va | https://www.coresite.com/news/coresite-publishes-annual-sustainability-report-joins-infrastructure-masons-climate-accord | https://americantower.gcs-web.com/news-releases/news-release-details/american-tower-corporation-releases-2024-sustainability	CoreSite VA3 page > facility overview/specifications; CoreSite PDF/news item noting VA3 renewable-energy claim; REC product context; American Tower 2024 report press release > key highlights.	CoreSite VA3 data center powered by 100% renewable energy. / American Tower announced the release of its 2024 sustainability executive report; energy innovation highlights are reported at parent-company level.
CyrusOne Data Centers operator/facility source	Tier B - renewable-share or procurement evidence	CyrusOne 2024 Sustainability Report; CyrusOne 2024 report press release	https://documents.cyrusone.com/wp-content/uploads/2024/11/2024_Sustainability_Report_10_4_24.pdf | https://www.cyrusone.com/media-coverage-press-releases/cyrusone-publishes-2024-sustainability-report	2024 Sustainability Report > Environmental Impact > Energy Origination Metrics and Targets, p.43.	Procured Carbon-free Electricity... CyrusOne-Procured Renewables 18.1%; CyrusOne-Procured Nuclear 4.0%; Customer-Procured Renewables 39.4%; Renewable Certificate Procurement 0.2%; Total Carbon Free Electricity 61.6%. Scope: Includes facilities that are directly managed by CyrusOne.
Digital Connexion operator/facility source	Tier B - renewable-share or procurement evidence	Digital Realty sustainability page / 2024 Impact Report release; Economic Times Digital Connexion investment report	https://www.digitalrealty.com/about/sustainability | https://investor.digitalrealty.com/news-releases/news-release-details/digital-realty-published-2024-impact-report-highlighting | https://m.economictimes.com/tech/technology/ril-jv-lines-up-11-billion-for-1-gw-vizag-data-hub/articleshow/125603327.cms	Digital Realty sustainability page > Spotlight on sustainability; 2024 Impact Report press release; Economic Times article body.	75% Our global renewable energy coverage. 185 The number of our data centers matched with 100% renewable energy. / Digital Connexion... is investing Rs 98,000 crore or $11 billion till 2030 to establish a 1 GW data centre cluster in Visakhapatnam.
Edged Energy operator/facility source	Tier B - renewable-share or procurement evidence	Edged Spain Sustainability page; Edged U.S. Sustainability page	https://www.edged.es/sustainability | https://www.edged.us/sustainability	Sustainability page > Highlights from the field > On-site Solar Farm.	All our sites in Spain are powered by 100% renewable energy. At our data center in Bilbao-Arasur, that includes power from an adjacent 135 MW solar farm... along with other clean energy sources.
Flexential operator/facility source	Tier B - renewable-share or procurement evidence	Flexential FY 2024 ESG Report; Flexential 2024 ESG Report press release; Flexential ESG page	https://www.flexential.com/resources/report/flexential-esg-report-2024 | https://www.flexential.com/resources/press-release/flexentials-2024-esg-report-details-advancements-across-data-center | https://www.flexential.com/company/esg	FY2024 ESG Report > energy/environmental metrics; July 15, 2025 press release announcing the 2024 ESG Report; ESG page > FY2024 ESG Report.	2024 renewable electricity share: 35%; renewable electricity: 391 GWh; total purchased electricity: 1,113 GWh. Renewable electricity includes hydro, solar, wind, geothermal and biomass.
Galaxy operator/facility source	Tier A - direct company market-based electricity-emissions evidence	Center for Resource Solutions / Green-e 2024 Residual Mix Emissions Rates (2022 Data)	https://resource-solutions.org/2024-residual-mix/	2024 Green-e Residual Mix Emission Rates (2022 Data), eGRID subregion ERCT row, Adjusted System Mix (lbs/MWh) (12-month vintage).	ERCT ... Emission Rate (lb/MWh) 771.083 ... Adjusted System Mix (lbs/MWh) (12-month vintage) 863.9053316.
Google operator/facility source	Tier B - renewable-share or procurement evidence	Google 2025 Environmental Report blog / report page	https://blog.google/company-news/outreach-and-initiatives/sustainability/environmental-report-2025/ | https://www.sustainability.google/reports/google-2025-environmental-report/	Google 2025 Environmental Report blog > energy progress section.	In 2024... 2.5 GW of projects came online... pushed carbon-free energy use from 64% to 66% on an hourly basis... In 2024, we announced contracts to purchase over 8 GW of carbon-free energy generation capacity.
Kuaishou operator/facility source	Tier B - renewable-share or procurement evidence	Kuaishou 2024 ESG Report press release / ESG overview	https://ir.kuaishou.com/news-releases/news-release-details/kuaishou-releases-2024-esg-report-harnessing-technology-build | https://ir.kuaishou.com/esg?mobile=1	Press release > Technology Advancing Green and Low-Carbon Operations.	In 2024, Kuaishou’s self-built data center, Kuaishou Smart Cloud Ulanqab Data Center, purchased a total of 411,779 MWh of green electricity and green power certificates, accounting for 87.1% of its annual electricity consumption.
Meta operator/facility source	Tier A - direct company market-based electricity-emissions evidence	Meta 2025 Environmental Data Index	https://sustainability.atmeta.com/wp-content/uploads/2025/10/Meta_2025-Environmental-Data-Index.pdf	2025 Environmental Data Index, 2024 data centers GHG and energy tables.	Data centers Scope 2 market-based emissions = 135 tCO2e; data centers electricity consumption = 18,061,781 MWh.
Microsoft operator/facility source	Tier B - renewable-share or procurement evidence	Microsoft 2025 Environmental Sustainability Report; Microsoft 2026 renewable energy milestone update / Reuters	https://www.microsoft.com/en-us/corporate-responsibility/sustainability/report/ | https://blogs.microsoft.com/blog/2026/02/18/a-milestone-achievement-in-our-journey-to-carbon-negative/ | https://www.reuters.com/sustainability/climate-energy/microsoft-keep-buying-enough-renewable-energy-match-all-its-electricity-needs-2026-02-18/	2025 report > Carbon > Scaling access to decarbonization tools; 2026 milestone post / Reuters article.	Microsoft has contracted 34 GW of new renewable energy across 24 countries, expanding access to carbon-free electricity... / Microsoft announced it will continue purchasing enough renewable energy to match 100% of its electricity usage, a goal it reached in 2025.
NTT DATA, Inc. operator/facility source	Tier B - renewable-share or procurement evidence	NTT DATA Sustainability Report FY24; NTT DATA SASB Standard Contrast Chart; NTT DATA 2026 net-zero update	https://services.global.ntt/-/media/ntt/global/about-us/sustainability/sustainability-report-fy24-ntt-data.pdf?rev=b4d54dc0816e4301a668d3bcb2cfcc67 | https://www.nttdata.com/global/en/about-us/sustainability/report/sasb-standard-contrast-chart | https://us.nttdata.com/en/news/press-release/2026/april/ntt-data-underscores-progress-toward-net-zero	Sustainability Report FY24, Investing in renewable energy, p.2/p.18; SASB page energy section.	As of the end of FY24... 59% of the electricity powering our operations now comes from renewable or low-carbon sources... We also saw an 8% increase in renewable energy, up from 46% in FY23 to 54% in FY24. / renewable energy made up 56% of electricity consumed.
Novva operator/facility source	Tier B - renewable-share or procurement evidence	Novva partner page; Novva homepage; Novva sustainability articles	https://www.novva.com/partners/ | https://www.novva.com/ | https://www.novva.com/media-center/sustainable-power-solutions-for-data-centers/ | https://www.novva.com/media-center/achieving-genuine-sustainability-in-data-center-operations-without-greenwashing/	Novva partner page > Become a Partner; Novva homepage > colocation data center innovation; Sustainable Power Solutions article > Commitment to Sustainability; Greenwashing article > Sustainability at Novva.	Our platform allows for bespoke configurations operated with 100% renewable energy, waterless cooling solutions, and are always carrier neutral. / Renewable energy, liquid cooling, on-site power generation, rainfall water recapture and HVO-powered backup generators are technologies Novva says it builds into facilities from day one.
Oracle operator/facility source	Tier B - renewable-share or procurement evidence	Oracle FY2024 Environmental and Social Impact Datasheet summary; Oracle Planet page	https://www.sustainabilityreports.com/oracle/2024/environmental-and-social-impact-datasheet | https://www.oracle.com/corporate/citizenship/sustainability/facilities/data-centers.html	SustainabilityReports.com Oracle 2024 Environmental and Social Impact Datasheet summary; Oracle Planet page > Our commitment / Progress to date.	86% renewable energy coverage for Oracle Cloud Infrastructure. / In 2025, we matched 100% of our annual electricity use with renewable energy... powering our offices and public cloud data centers with 100% carbon-free electricity.
Patmos Hosting, Inc. operator/facility source	Tier B - renewable-share or procurement evidence	Patmos Custom Data Centers page; Patmos Kansas City AI Campus press releases	https://patmos.tech/high-density-ai-datacenters/ | https://patmos.tech/patmos-expands-kansas-citys-ai-capability-at-new-datacenter-facility/ | https://www.globenewswire.com/news-release/2026/01/12/3216865/0/en/Patmos-Secures-100-Million-C-PACE-Loan-to-Complete-AI-Data-Center-in-Kansas-City.html	Patmos high-density AI datacenters page > New Life for Old Facilities / Future-proof capacity; 2026 C-PACE press release.	Traditional datacenters aren’t built for the energy and cooling needs of GPU and AI infrastructure. We build for today and future-proof for tomorrow, from 4MW to 50MW and higher. / The C-PACE loan will fund energy-efficient infrastructure improvements.
Riot Platforms, Inc. operator/facility source	Tier B - renewable-share or procurement evidence	Riot Platforms FY2024 results; Riot Platforms 2024 Form 10-K	https://www.riotplatforms.com/riot-platforms-reports-full-year-2024-financial-results-current-operational-and-financial-highlights/ | https://www.sec.gov/Archives/edgar/data/1167419/000155837025001888/riot-20241231x10k.htm	FY2024 results > Financial and Operational Highlights; 2024 Form 10-K > Business Segments / Liquidity and Capital Resources; power purchase/demand response/electricity hedging context only.	This low cost to mine was made possible by Riot’s unique power strategy... all-in cost of power of 3.4 cents per kilowatt hour across all facilities during the year. / As of December 31, 2024, our Bitcoin Mining business segment had a total deployed hash rate of 31.5 EH/s.
Sabey Data Center Properties LLC operator/facility source	Tier B - renewable-share or procurement evidence	Sabey Data Centers sustainability page; Sabey 2024 Sustainability Report; Sabey 2024 Sustainability Report announcement / advanced nuclear partnership news	https://sabeydatacenters.com/expertise/sustainability | https://39943764.fs1.hubspotusercontent-na1.net/hubfs/39943764/SDC%20Downloadables/Sustainability/2024%20Sustainability%20Report%20External%201.pdf | https://sabeydatacenters.com/news/sabey-achieves-over-25-carbon-emissions-cut-pioneers-advanced-nuclear-partnership	Sustainability page > Sustainability Report / 2029 net-zero carbon pledge; 2024 Sustainability Report electricity and Scope 2 context; 2025 announcement for 2024 Sustainability Report highlights.	We’re happy to share our 2024 Sustainability Report... cut our emissions and hit our 2029 net-zero carbon pledge. / 25.2% reduction in Scope 1 and Scope 2 carbon emissions from a 2018 baseline. Report context includes net Scope 2, total electricity/fuel mix and grid-factor information, but not a direct renewable electricity share/MWh.
SenseTime operator/facility source	Tier A - direct company market-based electricity-emissions evidence	SenseTime 2024 Sustainability Report; SenseTime 2025 Sustainability Report	https://www1.hkexnews.hk/listedco/listconews/sehk/2025/0424/2025042401051.pdf | https://www1.hkexnews.hk/listedco/listconews/sehk/2026/0427/2026042700736.pdf	2024 Sustainability Report p.47 Scope 2 table and reported-value notes; p.49 purchased electricity table. 2025 Sustainability Report p.34 market-based value; p.35 comparative energy table.	2024 report: Indirect GHG emissions (Scope 2) ... 83,660.4 tCO2e; Purchased electricity ... 155,976.2 MWh. 2024 report: Scope 2 mainly comes from indirect emissions caused by purchased electricity. 2025 report: market-based Scope 2 value is 101,789.73 tCO2e.
Switch operator/facility source	Tier B - renewable-share or procurement evidence	Switch sustainability page; Switch 2024 ESG report page; Switch power page	https://www.switch.com/sustainability/ | https://www.switch.com/esg-2024/ | https://www.switch.com/sustainable-data-centers/power/	Sustainability page > 100% Renewably Powered; ESG 2024 page; Power page.	Since January 2016, all Switch data centers have been powered by 100% renewable energy. / Powered by 100% renewable energy since 2016... / Clients of Switch are powered by 100% renewable energy.
T4 Group Ltd operator/facility source	Tier B - renewable-share or procurement evidence	Datacenters.com T4 Group profile; Data Center Dynamics article	https://www.datacenters.com/providers/t4-group | https://www.datacenterdynamics.com/en/news/t4-group-acquires-land-for-data-center-in-invercargill-new-zealand/	Datacenters.com profile > About T4 Group; DCD article body, Apr. 15, 2024. Third-party planned-project evidence only; legal-entity match unresolved.	...upcoming Invercargill data center is poised to be New Zealand’s first Tier 4 facility, built for hyperscale performance and powered entirely by renewable energy. / The company plans on using renewable energy for data center powering and putting in solar energy.
VNET Group, Inc. operator/facility source	Tier B - renewable-share or procurement evidence	VNET ESG page; VNET 2024 ESG report press release; VNET 2024 Form 20-F	https://www.vnet.com/en/esg.html | https://ir.21vianet.com/news-releases/news-release-details/vnet-publishes-2024-environmental-social-and-governance-report/ | https://www.sec.gov/Archives/edgar/data/1508475/000141057825000905/vnet-20241231x20f.htm	VNET ESG page highlights; 2024 ESG press release key highlights; Form 20-F ESG discussion.	18% Percentage of renewable energy; 360,880 Total energy from renewable sources (MWh). / Total energy from renewable sources reached 360,880 MWh... accounting for 18%... / In 2024, use of energy from renewable sources was about 360,880 MWh, and proportion... nearly 18%.
xAI operator/facility source	Tier B - renewable-share or procurement evidence	Reuters / TechCrunch / SELC coverage of xAI data center power; no official sustainability disclosure found	https://www.reuters.com/sustainability/sustainable-switch-us-civil-rights-group-threatens-sue-xai-over-pollution-2026-02-19/ | https://techcrunch.com/2025/07/03/xai-gets-permits-for-15-natural-gas-generators-at-memphis-data-center/ | https://techcrunch.com/2025/11/26/musks-xai-to-build-small-solar-farm-adjacent-to-colossus-data-center/	Reuters Sustainable Switch article; TechCrunch data center power coverage.	The groups claim xAI's facilities... are powered by polluting gas turbines lacking proper permits. / xAI got permits for 15 natural gas turbines... / xAI to build small solar farm adjacent to Colossus data center.

## Sheet: S2_main_results_2024
Domain	Accounting basis	Low	Central	High	Unit
AI hardware manufacturing	Location-based emissions	6.49403	7.3253	8.21352	Mt CO2e/yr
AI hardware manufacturing	Market-based emissions	5.23508	5.90011	6.61103	Mt CO2e/yr
AI data-centre operations	Location-based emissions	19.5898	20.3846	21.3078	Mt CO2e/yr
AI data-centre operations	Market-based emissions	5.48702	5.71461	5.99356	Mt CO2e/yr

## Sheet: S3_corporate_MB_inputs
Panel A. Manufacturing suppliers
Supplier	Scope 2 market-based emissions (Mt CO2e)	Scope 2 location-based emissions (Mt CO2e)	Derived market-based intensity (g CO2e kWh-1)	2024 renewable-electricity share (%)
TSMC	10.9574	12.6749	427.98	14.1
Intel	0.097	3.179	10.1	98
Samsung DS	10.058	13.5667	346.88	24.8
Micron	4.00253	4.11873	435.13	8.5219
SK hynix	1.73955	3.81212	137.84	30
Panel B. Data-centre operators
Operator	AI-attributable electricity use (TWh)	Facility count	Location-based emissions (Mt CO2e)	Market-based emissions (Mt CO2e)	Market-based intensity (g CO2e kWh-1)	2024 renewable-electricity share (%)
Microsoft	11.4587	17	4.80095	0.0996904	8.7	100
Google	12.6756	10	3.32898	1.21306	95.7	100
Meta	5.01025	5	2.2927	3.74484e-05	0.00747435	100
Amazon AWS	7.12255	5	1.9738	0	0	100
Baidu Cloud	2.45723	2	1.61626	1.30724	532	5
SenseTime	1.45477	1	0.834602	0.786195	540.425	5.8
China Mobile Limited	1.18788	4	0.723281	0.682632	574.665	5.62
Galaxy	1.68192	1	0.565472	0.329105	195.672	41.8
Switch	1.43224	3	0.39792	0	0	100
VNET Group, Inc.	0.542131	4	0.324537	0.262215	483.675	18
AirTrunk	0.53217	1	0.32166	0.120125	225.726	74
Novva	0.5256	1	0.319157	0	0	100
Oracle	0.49056	1	0.29788	0.0225756	46.02	86
Riot Platforms, Inc.	0.7008	1	0.235613	0	0	100
xAI	0.5256	1	0.226271	0.226271	430.5	No verified 2024 renewable-electricity share
Chirisa	0.851472	1	0.226209	0	0	100
Aligned Data Centers	0.704933	5	0.187415	0	0	100
Core42 - G42 Company	0.3942	1	0.184292	0.10689	271.156	42
Patmos Hosting, Inc.	0.260172	1	0.165436	0.165436	635.873	No verified 2024 renewable-electricity share
Flexential	0.502533	13	0.158649	0.103122	205.204	35
Kuaishou	0.244514	1	0.15842	0.027664	113.139	87.1
CyrusOne Data Centers	0.432581	5	0.14365	0.0341938	79.046	61.6
Applied Digital Corporation	0.23652	1	0.143426	0	0	100
Digital Connexion	0.1971	1	0.139438	0.0348596	176.863	75
Sabey Data Center Properties LLC	0.436111	2	0.131803	0.135216	310.05	100
Edged Energy	0.575886	4	0.10718	0	0	100
NTT DATA, Inc.	0.145758	1	0.103117	0.0223089	153.054	54
CoreSite	0.619391	4	0.102296	0	0	100
Cologix	0.189216	2	0.0889877	0.0357749	189.069	65
T4 Group Ltd	0.70956	1	0.0852253	0	0	100

## Sheet: S4_mfg_supplier_inputs
Supplier	Scope 1 emissions (Mt CO2e)	Scope 2 market-based emissions (Mt CO2e)	Scope 2 location-based emissions (Mt CO2e)	Market-based emissions envelope (Mt CO2e)	Location-based emissions envelope (Mt CO2e)	2024 renewable-electricity share (%)
TSMC	1.82587	10.9574	12.6749	12.7833	14.5008	14.1
Intel	1.105	0.097	3.179	1.202	4.284	98
Samsung DS	4.489	10.058	13.5667	14.547	18.0557	24.8
Micron	2.57445	4.00253	4.11873	6.57698	6.69318	8.5219
SK hynix	3.76258	1.73955	3.81212	5.50214	7.5747	30

## Sheet: S5_module_inputs
Module	Mass, low-central-high (kg node-1)	GHG emissions, low-central-high (kg CO2e node-1)
CPU	0.5 / 0.8 / 1.2	20.9 / 32.1 / 43.3
DDR/DIMM	0.6 / 1.0 / 1.5	26.1 / 40.1 / 54.1
HBM	1.5 / 2.0 / 3.0	491.4 / 546.0 / 600.6
SSD/NVMe	1.0 / 1.3 / 1.3	30.0 / 40.0 / 50.0
NIC or interconnect adapter	0.5 / 1.0 / 2.0	18.2 / 28.0 / 37.8
Power subsystem	13.0 / 14.0 / 15.0	365.0 / 400.0 / 430.0
Thermal management	7.5 / 8.5 / 10.0	330.0 / 355.0 / 400.0
Mechanical enclosure and assembly	34.0 / 35.0 / 36.0	156.2 / 162.2 / 170.0
GPU module excluding HBM	15.5 / 17.5 / 19.5	291.9 / 449.0 / 606.2
NVSwitch/NVLink	1.5 / 2.5 / 3.5	56.6 / 87.0 / 117.5
Auxiliary boards and control electronics	12.5 / 16.0 / 18.0	390.0 / 500.0 / 560.0
Unallocated / unresolved	4.9 / 7.4 / 13.9	95.0 / 232.6 / 420.0

## Sheet: S6_module_supplier_mapping
Module	Figure category	Supplier or allocation bucket	Allocation weight or flag	Selected supplier mapped	Unallocated / unresolved share
CPU	CPU	Intel	0.749	Yes	0
CPU	CPU	TSMC	0.251	Yes	0
DDR/DIMM	DDR/DIMM	Samsung DS	0.3955	Yes	0
DDR/DIMM	DDR/DIMM	SK hynix	0.3677	Yes	0
DDR/DIMM	DDR/DIMM	Micron	0.225	Yes	0
DDR/DIMM	DDR/DIMM	unallocated	0.0118	No	0.0118
HBM	HBM	SK hynix	0.525	Yes	0
HBM	HBM	Samsung DS	0.424	Yes	0
HBM	HBM	Micron	0.051	Yes	0
SSD/NVMe	SSD/NVMe	Samsung DS	0.3951	Yes	0
SSD/NVMe	SSD/NVMe	SK hynix bucket	0.3134	Yes	0
SSD/NVMe	SSD/NVMe	Micron	0.1594	Yes	0
SSD/NVMe	SSD/NVMe	unallocated	0.1322	No	0.1322
GPU module excluding HBM	GPU module excluding HBM	TSMC	1	Partially	Not quantified
NVSwitch/NVLink	NVSwitch/NVLink	TSMC	0.8	Partially	0.2
NVSwitch/NVLink	NVSwitch/NVLink	unallocated	0.2	No	0.2
NIC or interconnect adapter	NIC or interconnect adapter	unallocated	1	No	1
Power subsystem	Power subsystem	unallocated	1	No	1
Thermal management	Thermal management	unallocated	1	No	1
Mechanical enclosure and assembly	Mechanical enclosure and assembly	unallocated	1	No	1
Auxiliary boards and control electronics	Auxiliary boards and control electronics	unallocated	1	No	1
Unallocated / unresolved	Unallocated / unresolved	unallocated	Residual bucket	No	Not applicable

## Sheet: S7_mfg_contribution_summary
Panel A. Supplier-level manufacturing contribution
Supplier	Accounting basis	Central allocated emissions (Mt CO2e)	Share of manufacturing total (%)	Main contributing modules
Samsung DS	Location-based emissions	2.8078	38.3302	HBM (1.361 Mt CO2e); Unallocated / unresolved (1.081 Mt CO2e); DDR/DIMM (0.274 Mt CO2e)
TSMC	Location-based emissions	2.2091	30.1571	GPU module excluding HBM (1.292 Mt CO2e); NVSwitch/NVLink (0.800 Mt CO2e); CPU (0.066 Mt CO2e)
SK hynix	Location-based emissions	1.17845	16.0874	HBM (0.966 Mt CO2e); DDR/DIMM (0.164 Mt CO2e); SSD/NVMe (0.031 Mt CO2e)
Micron	Location-based emissions	0.565861	7.72474	Unallocated / unresolved (0.327 Mt CO2e); DDR/DIMM (0.127 Mt CO2e); HBM (0.073 Mt CO2e)
Intel	Location-based emissions	0.364125	4.97078	Unallocated / unresolved (0.268 Mt CO2e); CPU (0.096 Mt CO2e)
unallocated	Location-based emissions	0.199963	2.72975	NVSwitch/NVLink (0.200 Mt CO2e)
Samsung DS	Market-based emissions	2.26218	38.3413	HBM (1.096 Mt CO2e); Unallocated / unresolved (0.871 Mt CO2e); DDR/DIMM (0.220 Mt CO2e)
TSMC	Market-based emissions	1.94745	33.0069	GPU module excluding HBM (1.139 Mt CO2e); NVSwitch/NVLink (0.705 Mt CO2e); CPU (0.058 Mt CO2e)
SK hynix	Market-based emissions	0.856007	14.5083	HBM (0.702 Mt CO2e); DDR/DIMM (0.119 Mt CO2e); SSD/NVMe (0.023 Mt CO2e)
Micron	Market-based emissions	0.556037	9.42418	Unallocated / unresolved (0.322 Mt CO2e); DDR/DIMM (0.125 Mt CO2e); HBM (0.072 Mt CO2e)
unallocated	Market-based emissions	0.176278	2.98771	NVSwitch/NVLink (0.176 Mt CO2e)
Intel	Market-based emissions	0.102166	1.73159	Unallocated / unresolved (0.075 Mt CO2e); CPU (0.027 Mt CO2e)
Panel B. Module-level manufacturing contribution
Module	Accounting basis	Central emissions (Mt CO2e)	Share of manufacturing total (%)	Main supplier attribution
HBM	Location-based emissions	2.39988	32.7615	Samsung DS (1.361 Mt CO2e)
Unallocated / unresolved	Location-based emissions	1.74481	23.819	Samsung DS (1.081 Mt CO2e)
GPU module excluding HBM	Location-based emissions	1.29238	17.6427	TSMC (1.292 Mt CO2e)
NVSwitch/NVLink	Location-based emissions	0.999813	13.6488	TSMC (0.800 Mt CO2e)
DDR/DIMM	Location-based emissions	0.564618	7.70778	Samsung DS (0.274 Mt CO2e)
Other observed modules	Location-based emissions	0.3238	4.42029	Intel (0.096 Mt CO2e)
HBM	Market-based emissions	1.86985	31.6917	Samsung DS (1.096 Mt CO2e)
Unallocated / unresolved	Market-based emissions	1.32543	22.4645	Samsung DS (0.871 Mt CO2e)
GPU module excluding HBM	Market-based emissions	1.13931	19.3099	TSMC (1.139 Mt CO2e)
NVSwitch/NVLink	Market-based emissions	0.881392	14.9386	TSMC (0.705 Mt CO2e)
DDR/DIMM	Market-based emissions	0.464316	7.86961	Samsung DS (0.220 Mt CO2e)
Other observed modules	Market-based emissions	0.219822	3.72573	Samsung DS (0.074 Mt CO2e)

## Sheet: S8_operator_screening
Company	Screening decision	Operator role	Source title	Source location	Source URL	Source data used
AirTrunk	Included	Hyperscale data-center operator	AirTrunk solutions page and JHB1 announcement	Why AirTrunk? L85; JHB1 announcement L82-L93	https://airtrunk.com/solutions/	Designs, builds and operates data centers for cloud and large technology customers; JHB1 is described as AI-ready with liquid cooling and high-density racks.
Aligned Data Centers	Included	AI/HPC colocation operator	Aligned Data Centers homepage	L346-L348; L361-L363	https://aligneddc.com/	Platform supports AI, HPC and cloud workloads; source describes adaptive data centers for cloud-to-AI and high-density infrastructure.
Amazon AWS	Included	Cloud AI data-center operator	AWS sustainability data centers page	L39-L45; L68-L70	https://aws.amazon.com/sustainability/data-centers/	Designs, builds and operates data centers; source describes facilities for next-generation AI innovation and AI-processor cooling design.
Applied Digital Corporation	Included	AI factory / HPC operator	Applied Digital homepage	L25-L36	https://www.applieddigital.com/	Designs, builds and operates large-scale digital infrastructure and AI Factories for AI training and inference.
Baidu Cloud	Included	Intelligent-compute cloud operator	Baidu Cloud intelligent computing center page	L15-L17; L34	https://cloud.baidu.com/solution/cloud/zhisuancenter.html	Provides computing, algorithm and data services for AI scenarios, including large-model training/inference, autonomous driving and AIGC.
China Mobile Limited	Included	Telecom intelligent-compute operator	China Mobile Global Intelligence Center release	L422-L425; L434-L437	https://www.prnewswire.com/apac/news-releases/hong-kongs-largest-standalone-intelligent-computing-hub--the-official-launch-of-china-mobile-global-intelligence-center-302726083.html	Global Intelligence Center integrates high-performance computing and intelligent processing for large-model training and inference.
Chirisa	Included	AI/HPC data-center developer/operator	Chirisa Technology Parks homepage	L24-L32; L47-L52; L79-L83	https://chirisatechnologyparks.com/	Delivers facilities for hyperscale, HPC and AI customers; source lists over 1 GW under development and operational or leased data-center campuses.
Cologix	Included	Colocation / interconnection operator	Cologix homepage	L224-L231; L283-L285	https://cologix.com/	Describes AI-ready digital infrastructure for AI inferencing and identifies network-neutral interconnection and hyperscale-edge data-center operations.
Core42 - G42 Company	Included	AI/cloud infrastructure operator	Core42 website	L55-L62; L83-L86; L113-L132	https://www.core42.ai/	Cloud and AI infrastructure supports inference/training workloads; source references owned in-country data centers and AI Cloud deployment.
CoreSite	Included	AI data-center colocation operator	CoreSite AI Data Center Solutions page	L260-L278; L282	https://www.coresite.com/industry-solutions/artificial-intelligence-service-providers	Data centers support AI workloads, GPU/TPU applications and NVIDIA DGX-ready deployment in scalable facilities.
CyrusOne Data Centers	Included	Hyperscale AI data-center operator	CyrusOne homepage and Intelliscale AI materials	L150-L152; L198-L202	https://www.cyrusone.com/	Designs, builds and operates global data centers; Intelliscale AI materials describe power density, cooling and scalability for AI workloads.
Digital Connexion	Included	Purpose-built AI data-center operator	Digital Connexion data center page	L123-L126; L176-L178	https://www.digitalconnexion.com/datacenter/?gad_source=1	Describes AI-ready infrastructure purpose-built for AI/HPC and operation of purpose-built AI data centers across India.
Edged Energy	Included	AI-ready high-density operator	Edged website	L54-L56; L88-L89; L397-L402; L419	https://www.edged.us/	Facilities are optimized for AI, with high-density air- and liquid-cooling capabilities and AI-ready positioning.
Flexential	Included	High-density colocation operator	Flexential high-density colocation page	L246-L248; L268-L273; L485-L489	https://www.flexential.com/products-services/high-density-colocation	High-density colocation supports HPC, AI, ML and GPU workloads; source references NVIDIA DGX-ready data centers.
Galaxy	Included	AI/HPC data-center infrastructure operator	Galaxy data center infrastructure page	L115-L120; L150-L160	https://www.galaxy.com/data-centers	Invests in and operates data-center infrastructure for AI and HPC, including AI-ready facilities for training and inference.
Google	Included	Cloud AI data-center operator	Google Data Centers and Cloud AI infrastructure materials	Google Data Centers L28-L32; Google Cloud AI infrastructure materials	https://datacenters.google/locations	Owns and operates global data centers; Google Cloud materials describe AI-optimized infrastructure for advanced AI workloads.
Kuaishou	Included	Captive AI/big-data data-center operator	Kuaishou investor relations release	L40-L48	https://ir.kuaishou.com/zh-hans/news-releases/news-release-details-50/	Smart Cloud Wulanchabu Data Center is described as a self-built hyperscale data center purpose-built for AI and big data.
Meta	Included	Captive hyperscale AI data-center operator	Meta Data Centers and engineering materials	Meta Data Centers L127-L130; Meta engineering L41-L44 and L56-L62	https://datacenters.atmeta.com/	Designs, builds and runs advanced data centers; engineering materials describe GPU clusters and Llama training infrastructure deployed in data-center fleets.
Microsoft	Included	Azure AI data-center operator	Microsoft Datacenters page	L90-L99; L208-L216	https://datacenters.microsoft.com/	Operates a global datacenter estate and invests in AI-enabled facilities and AI infrastructure.
NTT DATA, Inc.	Included	Global colocation data-center operator	NTT Global Data Centers page	L689-L702; L735-L746	https://services.global.ntt/en-us/services-and-products/global-data-centers	Operates 160+ data centers across 20+ countries; platform is described as AI-ready and provides colocation and data-center management services.
Novva	Included	AI-first colocation operator	Novva Data Centers for AI page	L31-L34; L57-L60; L62-L66	https://www.novva.com/data-center-services/data-centers-for-ai/	High-performance colocation facilities are purpose-built for AI; source says infrastructure is designed and operated as AI-ready.
Oracle	Included	OCI AI data-center operator	Oracle AI data centers page	L35-L50	https://www.oracle.com/data-centers/	Oracle describes a network of AI data centers used by OCI customers to train and run complex AI models.
Patmos Hosting, Inc.	Included	GPU / AI colocation provider	Patmos website	L90-L93; L117-L119; L139-L141	https://patmos.tech/	Provides custom high-density GPU data centers, scalable AI colocation and custom data centers built for AI.
Riot Platforms, Inc.	Included - transitional	Transitioning AI/HPC operator	Riot January 2026 AMD lease / Rockdale release	L62-L70; L73-L86	https://www.riotplatforms.com/riot-announces-fee-simple-acquisition-of-land-and-first-data-center-lease-with-amd-at-the-rockdale-site/	Rockdale site is fully owned and operated by Riot; AMD lease and approved power capacity support AI/HPC data-center use.
Sabey Data Center Properties LLC	Included	Multi-tenant data-center operator	Sabey data centers page and AI/liquid-cooling materials	Sabey Data Centers L32-L45; later official materials on Manhattan AI inference and liquid-cooling-ready workloads	https://sabey.com/data-centers/	Designs, builds and operates data centers; later materials reference AI inference, liquid-cooling-ready workloads and AI/HPC deployments.
SenseTime	Included	Captive AIDC / AI-cloud operator	SenseTime AIDC release	L517-L526; L530-L534	https://www.sensetime.com/en/news-detail/41164672?categoryId=1072	Shanghai Lingang AIDC is in operation and provides compute resources and large-scale data management for AI model training.
Switch	Included	High-density AI factory operator	Switch homepage	L38-L49; L83-L109; L111-L115	https://www.switch.com/	Operates high-density data centers and promotes EVO AI Factories for advanced AI workloads and NVIDIA GPU roadmap support.
T4 Group Ltd	Included - qualified	Regional AI-ready data-center operator	T4 Group about page and Datacom acquisition release	T4 L43-L47 and L120-L162; Datacom acquisition release L380-L409 and L418-L421	https://t4group.nz/about	T4 describes green colocation and hyperscale facilities; Datacom release states the Auckland data center will be upgraded for AI-ready workloads.
VNET Group, Inc.	Included	Carrier-neutral IDC / GPU compute operator	VNET homepage and computing-power-cluster page	Homepage L40-L70; computing power cluster L37-L40 and L55-L62	https://www.vnet.com/en/	China carrier-neutral data-center provider with 50+ data centers and wholesale IDC capacity; source describes GPU compute for AI and LLM training/inference.
xAI	Included	Captive AI supercomputing operator	xAI Colossus page	L12-L17; L23-L31; L64-L66	https://x.ai/colossus	Operates Colossus supercomputing infrastructure with large GPU clusters and published GPU-scale expansion roadmap.

## Sheet: S9_facility_summary
Domain	Operator / supplier	Facility	Geography	Latitude	Longitude	Activity value	Activity unit	Local location-based EF (g CO2e kWh-1)	Location-based emissions (Mt CO2e)	Market-based emissions (Mt CO2e)	Market-based / location-based ratio	2024 renewable-electricity share (%)	2030 commitment status
AI data-centre operations	Microsoft	Microsoft Busan (PUS05)	KOR	37.2809	127.443	605.109	MW	417.3	1.72492	0.0359617	0.0208483	100	Full 2030 commitment
AI data-centre operations	Microsoft	Microsoft Bison Business Park	US-WY	43.2909	-108.104	200	MW	758.612	0.930361	0.0106697	0.0114683	100	Full 2030 commitment
AI data-centre operations	Microsoft	Microsoft Cheyenne	US-WY	43.0759	-107.29	200	MW	758.612	0.930361	0.0106697	0.0114683	100	Full 2030 commitment
AI data-centre operations	Microsoft	Microsoft Project Alluvion	US-IA	42.0296	-94.1068	192	MW	256.09	0.200137	0.00679913	0.0339725	100	Full 2030 commitment
AI data-centre operations	Microsoft	Microsoft Middenmeer Campus	NLD	53.4245	6.85965	200	MW	253.312	0.191829	0.00658835	0.034345	100	Full 2030 commitment
AI data-centre operations	Microsoft	Microsoft Boydton Campus	US-VA	38.7509	-77.4753	300	MW	265.669	0.134798	0.0044143	0.0327476	100	Full 2030 commitment
AI data-centre operations	Microsoft	Microsoft Singapore Woodlands 2 (SG2)	SGP	1.35711	103.819	50	MW	402	0.123253	0.00266742	0.0216418	100	Full 2030 commitment
AI data-centre operations	Microsoft	Microsoft Goodyear Campus	US-AZ	34.4076	-114.237	143	MW	289.77	0.117608	0.00353105	0.0300238	100	Full 2030 commitment
AI data-centre operations	Microsoft	Microsoft El Mirage Campus	US-AZ	33.4484	-112.074	108	MW	289.77	0.0888231	0.00266681	0.0300238	100	Full 2030 commitment
AI data-centre operations	Microsoft	Microsoft Project Mountain	US-IA	41.9057	-91.7152	192	MW	256.09	0.0828143	0.00281341	0.0339725	100	Full 2030 commitment
AI data-centre operations	Microsoft	Microsoft Grange Castle Campus	IRL	53.404	-6.36423	200	MW	201.392	0.0762132	0.00329236	0.0431993	100	Full 2030 commitment
AI data-centre operations	Microsoft	Microsoft Singapore Woodlands	SGP	1.35711	103.819	20	MW	402	0.0493013	0.00106697	0.0216418	100	Full 2030 commitment
AI data-centre operations	Microsoft	Microsoft La Porte	US-IN	41.5836	-86.6959	11.025	MW	625.851	0.0477211	0.000663374	0.0139011	100	Full 2030 commitment
AI data-centre operations	Microsoft	Microsoft Sao Paulo	BRA	-14.235	-51.9253	60	MW	106.06	0.0390216	0.0032009	0.082029	100	Full 2030 commitment
AI data-centre operations	Microsoft	Microsoft San Antonio (SN7)	US-TX	30.2711	-97.7437	50	MW	336.206	0.030316	0.000784488	0.025877	100	Full 2030 commitment
AI data-centre operations	Microsoft	Microsoft Goodyear Airpark Campus	US-AZ	33.4484	-112.074	143	MW	289.77	0.020262	0.000608344	0.0300238	100	Full 2030 commitment
AI data-centre operations	Microsoft	Microsoft Gävle Campus	SWE	62	15	100	MW	34.89	0.0132035	0.00329236	0.249355	100	Full 2030 commitment
AI data-centre operations	Google	Google Middenmeer Data Center	NLD	53.4245	6.85965	1000	MW	253.312	1.55331	0.586832	0.377795	100	Full 2030 commitment
AI data-centre operations	Google	Google Council Bluffs Data Center	US-IA	41.9057	-91.7152	407	MW	256.09	0.754982	0.282135	0.373697	100	Full 2030 commitment
AI data-centre operations	Google	Google Eemshaven Data Center	NLD	53.4245	6.85965	185	MW	253.312	0.287362	0.108564	0.377795	100	Full 2030 commitment
AI data-centre operations	Google	Google Midlothian Data Center	US-TX	30.2711	-97.7437	100	MW	336.206	0.206162	0.0586832	0.284647	100	Full 2030 commitment
AI data-centre operations	Google	Google Changhua Data Center	TWN	24.1385	120.426	60	MW	494	0.181752	0.0352099	0.193725	100	Full 2030 commitment
AI data-centre operations	Google	Google Inzai Data Center	JPN	35.8183	140.133	60	MW	423	0.15563	0.0352099	0.226241	100	Full 2030 commitment
AI data-centre operations	Google	Google Saint-Ghislain Data Center	BEL	50.8503	4.3517	100	MW	126.92	0.0778273	0.0586832	0.754018	100	Full 2030 commitment
AI data-centre operations	Google	Google The Dalles Campus	US-OR	45.8594	-119.608	119	MW	168.597	0.0569438	0.0323227	0.567625	100	Full 2030 commitment
AI data-centre operations	Google	Google Hanau Data Center	DEU	50.2068	8.86682	100	MW	434	0.0315104	0.00694827	0.220507	100	Full 2030 commitment
AI data-centre operations	Google	Google Loudoun County Campus	US-VA	38.7509	-77.4753	1000	MW	265.669	0.023505	0.00846705	0.360223	100	Full 2030 commitment
AI data-centre operations	Meta	Meta Eagle Mountain Campus	US-UT	39.321	-111.094	300	MW	607.223	0.861723	1.0607e-05	1.23091e-05	100	Full 2030 commitment
AI data-centre operations	Meta	Meta Singapore Data Center	SGP	1.35711	103.819	150	MW	402	0.791348	1.47135e-05	1.85929e-05	100	Full 2030 commitment
AI data-centre operations	Meta	Meta Prometheus Campus	US-OH	41.4589	-83.6357	150	MW	470.297	0.333704	5.3035e-06	1.58928e-05	100	Full 2030 commitment
AI data-centre operations	Meta	Meta Fort Worth Data Center	US-TX	30.2711	-97.7437	400	MW	336.206	0.249743	5.55214e-06	2.22314e-05	100	Full 2030 commitment
AI data-centre operations	Meta	Meta Gallatin Campus	US-TN	35.5175	-86.5804	300	MW	330.085	0.0561869	1.27228e-06	2.26437e-05	100	Full 2030 commitment
AI data-centre operations	Amazon AWS	Amazon AWS PHL - 1125 Electron	US-PA	40.8781	-77.7996	960	MW	298.1	1.16989	0	0	100	Full 2030 commitment
AI data-centre operations	Amazon AWS	Amazon AWS IAD - John Marshall Campus	US-VA	38.816	-77.6504	223.5	MW	265.669	0.364099	0	0	100	Full 2030 commitment
AI data-centre operations	Amazon AWS	Amazon AWS SIN - 20 Loyang	SGP	1.37577	103.97	80	MW	402	0.197205	0	0	100	Full 2030 commitment
AI data-centre operations	Amazon AWS	Amazon AWS PDX - Gar Swanson Campus	US-OR	45.8594	-119.608	132.538	MW	168.597	0.137023	0	0	100	Full 2030 commitment
AI data-centre operations	Amazon AWS	Amazon AWS DUB - Blanchardstown Campus	IRL	53.404	-6.36423	85.5	MW	201.392	0.105587	0	0	100	Full 2030 commitment
AI data-centre operations	Baidu Cloud	Baidu Yangquan Cloud Computing Center	CN-SX	35.8617	104.195	233.9	MW	663.4	0.850499	0.68204	0.801929	5	Full 2030 commitment
AI data-centre operations	Baidu Cloud	Baidu Xushui-Dawangdian Cloud Computing Center	CN-HE	35.8617	104.195	100	MW	651.6	0.765757	0.625204	0.816452	5	Full 2030 commitment
AI data-centre operations	SenseTime	SenseTime Lingang Artificial Intelligence Computing Center	CN-SH	31.2942	121.522	209.896	MW	573.7	0.834602	0.786195	0.942	5.8	Full 2030 commitment
AI data-centre operations	China Mobile Limited	China Mobile Zhengzhou AI Computing Center	CN-HA	33.8763	114.382	125	MW	589.7	0.394362	0.384307	0.974505	5.62	Unclear / no verified 2030 commitment
AI data-centre operations	China Mobile Limited	China Mobile Hohhot	CN-NM	44.3809	115.423	100	MW	647.9	0.293713	0.260513	0.886966	5.62	Unclear / no verified 2030 commitment
AI data-centre operations	China Mobile Limited	China Mobile Harbin Intelligent Computing Center	CN-HL	47.9976	126.995	8.1	MW	522.9	0.0215231	0.0236538	1.099	5.62	Unclear / no verified 2030 commitment
AI data-centre operations	China Mobile Limited	China Mobile Beijing	CN-BJ	40.2782	116.68	5	MW	555.4	0.0136837	0.0141583	1.03469	5.62	Unclear / no verified 2030 commitment
AI data-centre operations	Galaxy	Helios Data Center	US-TX	29.7626	-98.5903	800	MW	336.206	0.565472	0.329105	0.582	41.8	Unclear / no verified 2030 commitment
AI data-centre operations	Switch	Switch LAS VEGAS - The Core Campus	US-NV	36.9197	-115.135	495	MW	277.831	0.390333	0	0	100	Full 2030 commitment
AI data-centre operations	Switch	Switch LAS VEGAS 3	US-NV	36.9197	-115.135	2.65559	MW	277.831	0.00379327	0	0	100	Full 2030 commitment
AI data-centre operations	Switch	Switch LAS VEGAS 4	US-NV	36.9197	-115.135	2.65559	MW	277.831	0.00379327	0	0	100	Full 2030 commitment
AI data-centre operations	VNET Group, Inc.	VNET Taicang Big Data Intelligent Computing Center	CN-JS	32.9243	119.312	210	MW	582.7	0.241185	0.200198	0.830058	18	Full 2030 commitment
AI data-centre operations	VNET Group, Inc.	VNET Huailai Super Artificial Intelligence Data Center	CN-HE	39.7683	116.475	32	MW	651.6	0.0410977	0.0305063	0.742288	18	Full 2030 commitment
AI data-centre operations	VNET Group, Inc.	VNET Ulanqab Super Intelligent Computing Flagship Base	CN-NM	44.3809	115.423	30	MW	647.9	0.0383103	0.0285997	0.746527	18	Full 2030 commitment
AI data-centre operations	VNET Group, Inc.	VNET Anhui (Suzhou) Gigawatt-scale AIDC Cluster	CN-JS	32.9243	119.312	1.125	MW	655.3	0.00394408	0.00291111	0.738097	18	Full 2030 commitment
AI data-centre operations	AirTrunk	AirTrunk Johor Bahru - JHB2	MYS	3.95172	109.678	270	MW	604.43	0.32166	0.120125	0.373453	74	Full 2030 commitment
AI data-centre operations	Novva	Novva Salt Lake City	US-UT	39.401	-111.807	200	MW	607.223	0.319157	0	0	100	Unclear / no verified 2030 commitment
AI data-centre operations	Oracle	Oracle Salt Lake City	US-UT	39.401	-111.807	80	MW	607.223	0.29788	0.0225756	0.0757876	86	Partial 2030 commitment
AI data-centre operations	Riot Platforms, Inc.	Riot Platforms Corsicana	US-TX	29.7626	-98.5903	1000	MW	336.206	0.235613	0	0	100	Unclear / no verified 2030 commitment
AI data-centre operations	xAI	xAI Colossus Memphis	US-TN	35.8495	-85.7945	150	MW	430.5	0.226271	0.226271	1	No verified 2024 renewable-electricity share	Unclear / no verified 2030 commitment
AI data-centre operations	Chirisa	Chirisa Richmond Technology Park	US-VA	37.7321	-77.9098	300	MW	265.669	0.226209	0	0	100	Unclear / no verified 2030 commitment
AI data-centre operations	Aligned Data Centers	Aligned PHX01	US-AZ	34.4076	-114.237	180	MW	289.77	0.0591125	0	0	100	Full 2030 commitment
AI data-centre operations	Aligned Data Centers	Aligned IAD-02	US-VA	37.7321	-77.9098	120	MW	265.669	0.0481801	0	0	100	Full 2030 commitment
AI data-centre operations	Aligned Data Centers	Aligned IAD-01	US-VA	37.7321	-77.9098	60	MW	265.669	0.0371745	0	0	100	Full 2030 commitment
AI data-centre operations	Aligned Data Centers	Aligned Northlake Campus	US-IL	39.214	-89.1038	100	MW	205.384	0.0221728	0	0	100	Full 2030 commitment
AI data-centre operations	Aligned Data Centers	Aligned PHX06	US-AZ	34.4076	-114.237	14.6922	MW	289.77	0.020775	0	0	100	Full 2030 commitment
AI data-centre operations	Core42 - G42 Company	Injazat Data Center	ARE	24.1954	54.2434	200	MW	467.51	0.184292	0.10689	0.58	42	Unclear / no verified 2030 commitment
AI data-centre operations	Patmos Hosting, Inc.	Patmos Kansas City	US-KS	39.3094	-95.6878	35	MW	635.873	0.165436	0.165436	1	No verified 2024 renewable-electricity share	Unclear / no verified 2030 commitment
AI data-centre operations	Flexential	Flexential Atlanta - Douglasville 2 Data Center	US-GA	32.5589	-82.5871	36	MW	300.889	0.0219286	0.0149551	0.681991	35	Unclear / no verified 2030 commitment
AI data-centre operations	Flexential	Flexential Denver - Parker	US-CO	38.8085	-105.653	22.5	MW	457.457	0.0202871	0.00910027	0.448575	35	Unclear / no verified 2030 commitment
AI data-centre operations	Flexential	Flexential Portland - Hillsboro 3 Data Center	US-OR	44.5839	-121.282	36	MW	168.597	0.0199383	0.0242674	1.21712	35	Unclear / no verified 2030 commitment
AI data-centre operations	Flexential	Flexential Denver - Englewood Data Center	US-CO	38.8085	-105.653	18	MW	457.457	0.019325	0.00866874	0.448575	35	Unclear / no verified 2030 commitment
AI data-centre operations	Flexential	Flexential Denver - Aurora Data Center	US-CO	38.8085	-105.653	6.75	MW	457.457	0.0159515	0.00715544	0.448575	35	Unclear / no verified 2030 commitment
AI data-centre operations	Flexential	Flexential Atlanta - Douglasville 1 Data Center	US-GA	32.5589	-82.5871	22.5	MW	300.889	0.0133437	0.00910027	0.681991	35	Unclear / no verified 2030 commitment
AI data-centre operations	Flexential	Flexential Dallas - Plano Data Center	US-TX	29.7626	-98.5903	18	MW	336.206	0.0119279	0.00728022	0.610351	35	Unclear / no verified 2030 commitment
AI data-centre operations	Flexential	Flexential Phiadelphia - Collegeville Data Center	US-PA	41.1498	-75.8864	7.2	MW	298.1	0.0101547	0.00699021	0.688371	35	Unclear / no verified 2030 commitment
AI data-centre operations	Flexential	Flexential Atlanta - Alpharetta Data Center	US-GA	32.5589	-82.5871	6	MW	300.889	0.00810619	0.00552834	0.681991	35	Unclear / no verified 2030 commitment
AI data-centre operations	Flexential	Flexential Las Vegas - North Data Center	US-NV	36.9197	-115.135	9	MW	277.831	0.00492845	0.00364011	0.738591	35	Unclear / no verified 2030 commitment
AI data-centre operations	Flexential	Flexential Salt Lake City - South Valley Data Center	US-UT	39.401	-111.807	1.2	MW	607.223	0.00484937	0.00163878	0.337938	35	Unclear / no verified 2030 commitment
AI data-centre operations	Flexential	Flexential Fort Lauderdale Data Center	US-FL	27.2317	-82.2098	3.15	MW	346.701	0.00400428	0.00237003	0.591874	35	Unclear / no verified 2030 commitment
AI data-centre operations	Flexential	Flexential Nashville - Franklin Data Center	US-TN	35.8495	-85.7945	6	MW	330.085	0.00390358	0.00242674	0.62167	35	Unclear / no verified 2030 commitment
AI data-centre operations	Kuaishou	Kuaishou Intelligent Cloud Ulanqab Data Center	CN-NM	44.3809	115.423	35.2787	MW	647.9	0.15842	0.027664	0.174624	87.1	Unclear / no verified 2030 commitment
AI data-centre operations	CyrusOne Data Centers	CyrusOne DFW3 - Allen	US-TX	29.7626	-98.5903	50	MW	336.206	0.082468	0.0193892	0.235112	61.6	Partial 2030 commitment
AI data-centre operations	CyrusOne Data Centers	CyrusOne DUR1 - Durham	US-NC	35.4795	-77.7561	50	MW	306.463	0.0345618	0.00891453	0.25793	61.6	Partial 2030 commitment
AI data-centre operations	CyrusOne Data Centers	CyrusOne AUS3 - Austin	US-TX	29.7626	-98.5903	24	MW	336.206	0.0156052	0.00366897	0.235112	61.6	Partial 2030 commitment
AI data-centre operations	CyrusOne Data Centers	CyrusOne AUS2 - Austin	US-TX	29.7626	-98.5903	9	MW	336.206	0.00551488	0.00129661	0.235112	61.6	Partial 2030 commitment
AI data-centre operations	CyrusOne Data Centers	CyrusOne CIN4 - Hamilton	US-OH	40.4114	-82.3877	4.725	MW	470.297	0.00550031	0.000924475	0.168077	61.6	Partial 2030 commitment
AI data-centre operations	Applied Digital Corporation	Applied Digital ELN01	US-ND	47.396	-97.0236	180	MW	606.401	0.143426	0	0	100	Unclear / no verified 2030 commitment
AI data-centre operations	Digital Connexion	Digital Connexion - Data Center in Chennai	IND	24.0189	83.4449	100	MW	707.45	0.139438	0.0348596	0.25	75	Partial 2030 commitment
AI data-centre operations	Sabey Data Center Properties LLC	SDC Austin Campus	US-TX	29.7626	-98.5903	84	MW	336.206	0.0759852	0.0793287	1.044	100	Full 2030 commitment
AI data-centre operations	Sabey Data Center Properties LLC	SDC Ashburn Campus	US-VA	37.7321	-77.9098	85	MW	265.669	0.0558178	0.0558875	1.00125	100	Full 2030 commitment
AI data-centre operations	Edged Energy	Edged Chicago Campus	US-IL	39.214	-89.1038	96	MW	205.384	0.0559611	0	0	100	Partial 2030 commitment
AI data-centre operations	Edged Energy	Edged Bilbao-Arasur Campus	ESP	40.2691	-4.48172	100	MW	145.89	0.0414071	0	0	100	Partial 2030 commitment
AI data-centre operations	Edged Energy	Edged Kansas City	US-KS	39.3094	-95.6878	24	MW	635.873	0.0090238	0	0	100	Partial 2030 commitment
AI data-centre operations	Edged Energy	Edged Barcelona	ESP	40.2691	-4.48172	16	MW	145.89	0.000787786	0	0	100	Partial 2030 commitment
AI data-centre operations	NTT DATA, Inc.	GDC - Navi Mumbai 1 Data Center	IND	24.0189	83.4449	30	MW	707.45	0.103117	0.0223089	0.216346	54	Full 2030 commitment
AI data-centre operations	CoreSite	CoreSite Santa Clara (SV8)	US-CA	36.1822	-120.557	25	MW	165.157	0.0468445	0	0	100	Partial 2030 commitment
AI data-centre operations	CoreSite	CoreSite Santa Clara (SV3)	US-CA	36.1822	-120.557	25	MW	165.157	0.0242742	0	0	100	Partial 2030 commitment
AI data-centre operations	CoreSite	CoreSite Santa Clara (SV4)	US-CA	36.1822	-120.557	25	MW	165.157	0.0230396	0	0	100	Partial 2030 commitment
AI data-centre operations	CoreSite	CoreSite Santa Clara (SV7)	US-CA	36.1822	-120.557	25	MW	165.157	0.00813809	0	0	100	Partial 2030 commitment
AI data-centre operations	Cologix	Cologix COL2	US-OH	40.4114	-82.3877	30	MW	470.297	0.0556173	0.0223593	0.40202	65	Full 2030 commitment
AI data-centre operations	Cologix	Cologix COL3-S	US-OH	40.4114	-82.3877	18	MW	470.297	0.0333704	0.0134156	0.40202	65	Full 2030 commitment
AI data-centre operations	T4 Group Ltd	T4 Auckland	NZL	-40.5262	173.452	8	MW	120.11	0.0852253	0	0	100	Unclear / no verified 2030 commitment
AI hardware manufacturing	Intel	Fab 11X (Rio Rancho)	US-NM	34.5199	-105.87	1	advanced packaging capacity undisclosed	347.934	0.0281382	0.000816809	0.0290285	98	Full 2030 commitment
AI hardware manufacturing	Intel	Fab 28	ISR	31.0461	34.8516	40000	300mm-equivalent wafer starts/month	567.26	0.0458756	0.000816809	0.0178049	98	Full 2030 commitment
AI hardware manufacturing	Intel	Fab 28A	ISR	31.0461	35.0316	13000	300mm-equivalent wafer starts/month	567.26	0.0458756	0.000816809	0.0178049	98	Full 2030 commitment
AI hardware manufacturing	Intel	Fab 34	IRL	53.404	-6.36423	65000	300mm-equivalent wafer starts/month	201.392	0.016287	0.000816809	0.0501509	98	Full 2030 commitment
AI hardware manufacturing	Intel	Fab 9 (Rio Rancho)	US-NM	34.5199	-105.69	1	advanced packaging capacity undisclosed	347.934	0.0281382	0.000816809	0.0290285	98	Full 2030 commitment
AI hardware manufacturing	Intel	Intel D1C / Hillsboro Oregon development fab	US-OR	44.5839	-121.282			168.597	0.0136348	0.000816809	0.0599061	98	Full 2030 commitment
AI hardware manufacturing	Intel	Intel D1D / Hillsboro Oregon development fab	US-OR	44.5839	-121.282			168.597	0.0136348	0.000816809	0.0599061	98	Full 2030 commitment
AI hardware manufacturing	Intel	Intel D1X / Hillsboro Oregon development fab	US-OR	44.5839	-121.282			168.597	0.0136348	0.000816809	0.0599061	98	Full 2030 commitment
AI hardware manufacturing	Intel	Intel Fab 12 / Ocotillo	US-AZ	34.4076	-114.237	16600	300mm-equivalent wafer starts/month	289.77	0.0234343	0.000816809	0.0348553	98	Full 2030 commitment
AI hardware manufacturing	Intel	Intel Fab 22 / Ocotillo	US-AZ	34.4076	-114.237	15800	300mm-equivalent wafer starts/month	289.77	0.0234343	0.000816809	0.0348553	98	Full 2030 commitment
AI hardware manufacturing	Intel	Intel Fab 24 / Leixlip	IRL	53.5315	-7.72332	24000	300mm-equivalent wafer starts/month	201.392	0.016287	0.000816809	0.0501509	98	Full 2030 commitment
AI hardware manufacturing	Intel	Intel Fab 32 / Ocotillo	US-AZ	34.4076	-114.237	21900	300mm-equivalent wafer starts/month	289.77	0.0234343	0.000816809	0.0348553	98	Full 2030 commitment
AI hardware manufacturing	Intel	Intel Fab 42 / Ocotillo	US-AZ	34.4076	-114.237	14300	300mm-equivalent wafer starts/month	289.77	0.0234343	0.000816809	0.0348553	98	Full 2030 commitment
AI hardware manufacturing	Intel	Intel Malaysia assembly/test and advanced packaging sites	MYS	3.95172	109.678			604.43	0.0488816	0.000816809	0.01671	98	Full 2030 commitment
AI hardware manufacturing	Micron	A3	TWN	24.1632	120.648	80000	production_capacity_wafers_per_month	494	0.0808152	0.0711845	0.88083	8.5219	Unclear / no verified 2030 commitment
AI hardware manufacturing	Micron	Fab 10	SGP	1.35711	103.819	140000	production_capacity_wafers_per_month	402	0.115088	0.124573	1.08241	8.5219	Unclear / no verified 2030 commitment
AI hardware manufacturing	Micron	Fab 6	US-VA	38.7509	-77.4753	70000	production_capacity_wafers_per_month	265.669	0.038029	0.0622864	1.63787	8.5219	Unclear / no verified 2030 commitment
AI hardware manufacturing	Micron	Micron Boise (Headquarters campus)	US-ID	43.6166	-116.201	5676.67	production_capacity_wafers_per_month	145.377	0.00168758	0.00505113	2.99312	8.5219	Unclear / no verified 2030 commitment
AI hardware manufacturing	Micron	Micron Semiconductor Asia	SGP	1.4369	103.786	70001.5	production_capacity_wafers_per_month	402	0.0575453	0.0622877	1.08241	8.5219	Unclear / no verified 2030 commitment
AI hardware manufacturing	Micron	Micron Hiroshima wafer fab	JPN	37.2023	137.166	70001.5	300mm-equivalent wafer starts/month	423	0.0605514	0.0622877	1.02868	8.5219	Unclear / no verified 2030 commitment
AI hardware manufacturing	Micron	Micron Taichung fab complex excluding A3	TWN	23.8614	121.105	70001.5	300mm-equivalent wafer starts/month	494	0.0707148	0.0622877	0.88083	8.5219	Unclear / no verified 2030 commitment
AI hardware manufacturing	Micron	Micron Taoyuan / Linkou wafer fab site	TWN	23.8614	121.105	70001.5	300mm-equivalent wafer starts/month	494	0.0707148	0.0622877	0.88083	8.5219	Unclear / no verified 2030 commitment
AI hardware manufacturing	Micron	Micron Advanced Assembly and Test Taiwan / Taichung	TWN	23.8614	121.105	70001.5	300mm-equivalent wafer starts/month	494	0.0707148	0.0622877	0.88083	8.5219	Unclear / no verified 2030 commitment
AI hardware manufacturing	SK hynix	Dalian NAND fab	CN-LN	41.8357	123.429	80000		487.8	0.159868	0.0451746	0.282575	30	Partial 2030 commitment
AI hardware manufacturing	SK hynix	M16	KOR	37.2809	127.443	17500	production_capacity_wafers_per_month	417.3	0.0299168	0.00988193	0.330314	30	Partial 2030 commitment
AI hardware manufacturing	SK hynix	SK hynix M15X (Cheongju)	KOR	36.6421	127.489	60000	production_capacity_wafers_per_month	417.3	0.102572	0.0338809	0.330314	30	Partial 2030 commitment
AI hardware manufacturing	SK hynix	Wuxi DRAM fab	CN-JS	32.9711	119.455	185000	production_capacity_wafers_per_month	582.7	0.441617	0.104466	0.236554	30	Partial 2030 commitment
AI hardware manufacturing	SK hynix	SK hynix M10 / Icheon	KOR	36.7619	127.582	100000	300mm-equivalent wafer starts/month	417.3	0.170953	0.0564682	0.330314	30	Partial 2030 commitment
AI hardware manufacturing	SK hynix	SK hynix M14 / Icheon	KOR	36.7619	127.582	80000	300mm-equivalent wafer starts/month	417.3	0.136762	0.0451746	0.330314	30	Partial 2030 commitment
AI hardware manufacturing	SK hynix	SK hynix M15 / Cheongju	KOR	36.7619	127.582	80000	300mm-equivalent wafer starts/month	417.3	0.136762	0.0451746	0.330314	30	Partial 2030 commitment
AI hardware manufacturing	Samsung DS	Austin campus fabs	US-TX	30.2711	-97.7437	135000		336.206	0.215643	0.222489	1.03175	24.8	Unclear / no verified 2030 commitment
AI hardware manufacturing	Samsung DS	F1x1	CN-SN	34.261	108.942	100000	production_capacity_wafers_per_month	633.5	0.300983	0.164807	0.547561	24.8	Unclear / no verified 2030 commitment
AI hardware manufacturing	Samsung DS	Pyeongtaek foundry line	KOR	37.2809	127.623	135000		417.3	0.267657	0.222489	0.831249	24.8	Unclear / no verified 2030 commitment
AI hardware manufacturing	Samsung DS	Samsung Foundry Hwaseong	KOR	37.2185	127.066	7000	production_capacity_wafers_per_month	417.3	0.0138785	0.0115365	0.831249	24.8	Unclear / no verified 2030 commitment
AI hardware manufacturing	Samsung DS	Samsung Memory Pyeongtaek	KOR	37.0356	127.06	170000	production_capacity_wafers_per_month	417.3	0.337049	0.280172	0.831249	24.8	Unclear / no verified 2030 commitment
AI hardware manufacturing	Samsung DS	Xi'an NAND fab	CN-SN	34.261	109.122	200000	production_capacity_wafers_per_month	633.5	0.601967	0.329614	0.547561	24.8	Unclear / no verified 2030 commitment
AI hardware manufacturing	Samsung DS	Samsung Giheung 6 Line	KOR	36.7619	127.582	135000	300mm-equivalent wafer starts/month	417.3	0.267657	0.222489	0.831249	24.8	Unclear / no verified 2030 commitment
AI hardware manufacturing	Samsung DS	Samsung Giheung S1	KOR	36.7619	127.582	135000	300mm-equivalent wafer starts/month	417.3	0.267657	0.222489	0.831249	24.8	Unclear / no verified 2030 commitment
AI hardware manufacturing	Samsung DS	Samsung Onyang semiconductor packaging/test plant	KOR	36.7619	127.582	135000	300mm-equivalent wafer starts/month	417.3	0.267657	0.222489	0.831249	24.8	Unclear / no verified 2030 commitment
AI hardware manufacturing	Samsung DS	Samsung Cheonan semiconductor packaging/test plant	KOR	36.7619	127.582	135000	300mm-equivalent wafer starts/month	417.3	0.267657	0.222489	0.831249	24.8	Unclear / no verified 2030 commitment
AI hardware manufacturing	TSMC	Arizona Fab (Fab 21)	US-AZ	33.4484	-112.074	20000	production_capacity_wafers_per_month	289.77	0.0174341	0.0257495	1.47697	14.1	Partial 2030 commitment
AI hardware manufacturing	TSMC	Camas Fab (Fab 11 / TSMC Washington)	US-WA	47.4009	-121.49	99000		103.685	0.0308792	0.12746	4.1277	14.1	Partial 2030 commitment
AI hardware manufacturing	TSMC	Fab 12	TWN	24.1632	120.828	100000	production_capacity_wafers_per_month	494	0.148608	0.128748	0.866356	14.1	Partial 2030 commitment
AI hardware manufacturing	TSMC	Fab 14	TWN	24.1632	120.468	100000	production_capacity_wafers_per_month	494	0.148608	0.128748	0.866356	14.1	Partial 2030 commitment
AI hardware manufacturing	TSMC	Fab 15	TWN	24.1632	121.008	100000	production_capacity_wafers_per_month	494	0.148608	0.128748	0.866356	14.1	Partial 2030 commitment
AI hardware manufacturing	TSMC	Fab 18	TWN	24.1632	120.288	100000	production_capacity_wafers_per_month	494	0.148608	0.128748	0.866356	14.1	Partial 2030 commitment
AI hardware manufacturing	TSMC	Fab 20	TWN	24.1632	121.188	100000	production_capacity_wafers_per_month	494	0.148608	0.128748	0.866356	14.1	Partial 2030 commitment
AI hardware manufacturing	TSMC	Fab 22	TWN	24.1632	120.108	100000	production_capacity_wafers_per_month	494	0.148608	0.128748	0.866356	14.1	Partial 2030 commitment
AI hardware manufacturing	TSMC	Kumamoto Fab (JASM)	JPN	35.8183	140.133	55000	production_capacity_wafers_per_month	423	0.0699872	0.0708112	1.01177	14.1	Partial 2030 commitment
AI hardware manufacturing	TSMC	Nanjing Fab (Fab 16)	CN-JS	32.9711	119.635	20000	production_capacity_wafers_per_month	582.7	0.0350583	0.0257495	0.734477	14.1	Partial 2030 commitment
AI hardware manufacturing	TSMC	TSMC Advanced Backend Fab 2	TWN	23.1065	120.274	88000	production_capacity_wafers_per_month	494	0.130775	0.113298	0.866356	14.1	Partial 2030 commitment
AI hardware manufacturing	TSMC	TSMC Advanced Backend Fab 3	TWN	24.993	121.301	100000	production_capacity_wafers_per_month	494	0.148608	0.128748	0.866356	14.1	Partial 2030 commitment
AI hardware manufacturing	TSMC	TSMC Advanced Backend Fab 5	TWN	24.1573	120.667	48000	production_capacity_wafers_per_month	494	0.0713319	0.0617988	0.866356	14.1	Partial 2030 commitment
AI hardware manufacturing	TSMC	TSMC Advanced Backend Fab 6	TWN	24.6837	120.873	99000	production_capacity_wafers_per_month	494	0.147122	0.12746	0.866356	14.1	Partial 2030 commitment
AI hardware manufacturing	TSMC	TSMC Fab 2 / Hsinchu 6-inch fab	TWN	23.8614	121.105	99000	300mm-equivalent wafer starts/month	494	0.147122	0.12746	0.866356	14.1	Partial 2030 commitment
AI hardware manufacturing	TSMC	TSMC Fab 3 / Hsinchu 8-inch fab	TWN	23.8614	121.105	99000	300mm-equivalent wafer starts/month	494	0.147122	0.12746	0.866356	14.1	Partial 2030 commitment
AI hardware manufacturing	TSMC	TSMC Fab 5 / Hsinchu 8-inch fab	TWN	23.8614	121.105	99000	300mm-equivalent wafer starts/month	494	0.147122	0.12746	0.866356	14.1	Partial 2030 commitment
AI hardware manufacturing	TSMC	TSMC Fab 6 / Tainan 8-inch fab	TWN	23.8614	121.105	31111.1	300mm-equivalent wafer starts/month	494	0.0462336	0.0400548	0.866356	14.1	Partial 2030 commitment
AI hardware manufacturing	TSMC	TSMC Fab 8 / Hsinchu 8-inch fab	TWN	23.8614	121.105	99000	300mm-equivalent wafer starts/month	494	0.147122	0.12746	0.866356	14.1	Partial 2030 commitment
AI hardware manufacturing	TSMC	TSMC China Company Limited Fab 10 / Shanghai 8-inch fab	CN-SH	31.2942	121.522	48888.9	300mm-equivalent wafer starts/month	573.7	0.0843744	0.0629432	0.746	14.1	Partial 2030 commitment
AI hardware manufacturing	TSMC	TSMC Advanced Backend Fab 1 / Hsinchu	TWN	23.8614	121.105	99000	300mm-equivalent wafer starts/month	494	0.147122	0.12746	0.866356	14.1	Partial 2030 commitment

[truncated: 1 more sheets: S10_crosscheck_sensitivity]
