# Supplementary material
Source: Research Square preprint supplement (doi:10.21203/rs.3.rs-9963675/v1)
Supplement: Supplementary file 3 [file a72ac3c474c9736af2491003.doc]

Supplementary Information Guide

# Supplementary files

| **Submitted file name** | **Title for online SI link** | **Text summary (≤50 words)** |
| --- | --- | --- |
| Supplementary_Information.pdf | Supplementary Information: module definitions, accounting equations and evidence-treatment rules | This file contains Supplementary Methods S1-S12, Supplementary Tables S1-S8 and supplementary equations supporting the 2024 AI hardware manufacturing and data-center operations greenhouse-gas accounting framework, including notation, boundaries, evidence coding, location-based and market-based definitions, facility-source operations, manufacturing allocation and robustness checks. |
| Supplementary_Fig_1_12_module_AI_server_node_boundary.png | Supplementary Fig. 1 | Twelve-module AI server/node boundary | Schematic of the 12-module AI server/node boundary used for allocation and diagnostics, distinguishing compute, memory, accelerator, interconnect, storage, networking, power, thermal, enclosure, auxiliary and residual components, and identifying unallocated fractions as boundary-preserving remainders rather than zero-emissions assumptions. |
| Supplementary_Fig_2_2024_full_exact_geography_rankings.jpeg | Supplementary Fig. 2 | 2024 full exact-geography rankings | Ranks 2024 manufacturing and operations greenhouse-gas emissions by resolved geography. Bars show location-based emissions, while diamonds show implied market-based values applied to the same activity weights, supporting comparison between physical grid exposure and procurement-adjusted reporting factors. |
| Supplementary_Fig_3_2024_renewable_status_decarbonization_maturity.jpeg | Supplementary Fig. 3 | 2024 renewable status and decarbonization maturity | Summarizes 2024 renewable-electricity status and qualitative decarbonization-maturity indicators for manufacturing suppliers and operations entities, including annual or hourly matching, 2030 commitments, value-chain or supply-chain action, and verified clean-electricity pathways used for source-policy interpretation and audit. |
| Supplementary_Fig_4_2024_operations_facility_LB_MB_by_company.jpeg | Supplementary Fig. 4 | 2024 operations facility LB/MB by company | Aggregates approved 2024 facility-source operations records by matched company, comparing location-based emissions using local or regional emission factors with market-based emissions selected through the tiered evidence protocol while holding facility electricity fixed. |
| Supplementary_Fig_5_2024_facility_level_emission_factor_exposure_distribution.jpeg | Supplementary Fig. 5 | 2024 facility-level emission-factor exposure distribution | Shows activity-weighted local location-based emission-factor exposure distributions and sorted exact-geography audits for manufacturing and operations, diagnosing whether location-based results reflect broad activity-weighted exposure or a small number of high-emission-factor geographies. |
| Supplementary_Fig_6_product_family_decomposition.jpeg | Supplementary Fig. 6 | Product-family decomposition relocated from the main panel | Reports manufacturing emissions by product-family layer for selected hardware module groups under location-based and market-based accounting, supporting interpretation of HBM, GPU, NVSwitch/NVLink and DDR/DIMM contributions while preserving the 12-module boundary and unallocated remainder. |
| Code_Release_Repository.zip | Code archive: public release version repository | Archive of the public release repository used to reproduce data processing, emissions accounting, scenario calculations, figure generation and audit outputs for the analysis. It includes source code, configuration files and documentation corresponding to the submitted manuscript version. |

**Submission note:** The file names above use standardized submission names. If the uploaded files retain different local names, please keep the titles and summaries unchanged and align the filenames in the submission system before upload.
