# Supplementary material
Source: Research Square preprint supplement (doi:10.21203/rs.3.rs-9963675/v1)
Supplement: Supplementary file 6 [file d54ec35228819b34da1d8f43.pdf]

# 12-Module Final: Representative AI Server / Node Structural Decomposition

Example based on Dell XE9680L / HGX-class 8-GPU liquid-cooled node (schematic, not official hardware drawing)

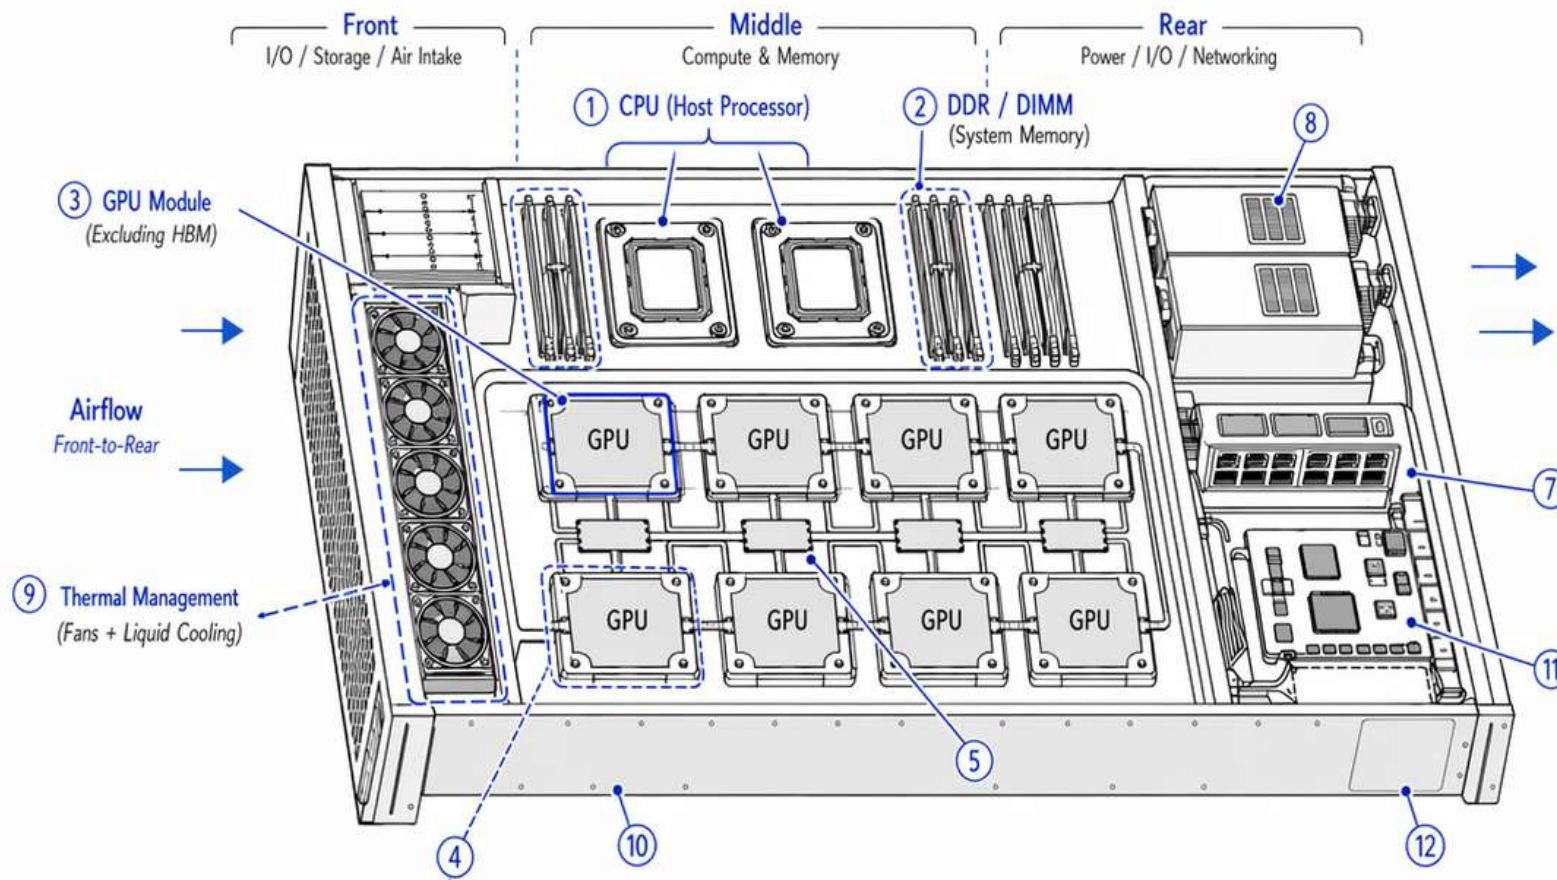

| 12 Modules |                                                       |
|------------|-------------------------------------------------------|
| ①          | CPU (Host Processor)                                  |
| ②          | DDR / DIMM (System Memory)                            |
| ③          | GPU Module (Excluding HBM)                            |
| ④          | HBM (Package-level High-Bandwidth Memory)             |
| ⑤          | NVSwitch / NVLink (Intra-node GPU Interconnect)       |
| ⑥          | SSD / NVMe (Boot / Local Cache Storage)               |
| ⑦          | NIC / InfiniBand / Ethernet (Inter-node Networking)   |
| ⑧          | Power Subsystem (PSU + PDB)                           |
| ⑨          | Thermal Management (Fans + Liquid Cooling)            |
| ⑩          | Mechanical Enclosure & Assembly                       |
| ⑪          | Auxiliary Boards & Control Electronics                |
| ⑫          | Residual Minor Parts (Cables / Connectors / Brackets) |

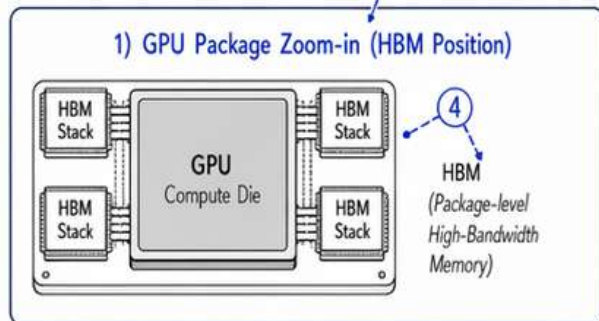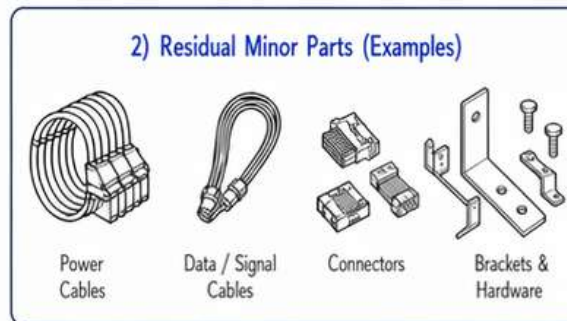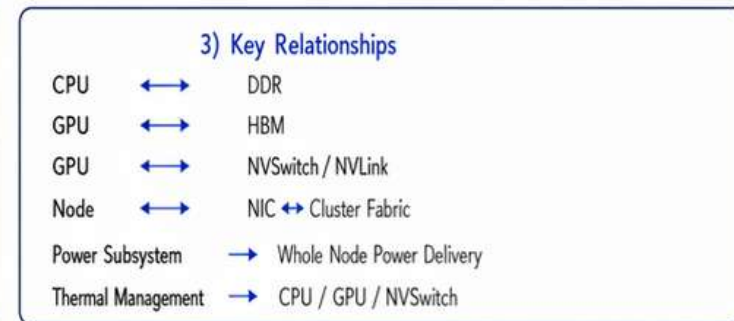

Hierarchy note: GPU module = compute device; HBM = package-level memory; NVSwitch/NVLink = inter-GPU fabric.

This figure is intended for server/node-boundary structural and GHG decomposition, emphasizing relative location, state, and connectivity rather than exact service dimensions.
