# Supplementary material
Source: Research Square preprint supplement (doi:10.21203/rs.3.rs-9963675/v1)

S-Figure 2 | 2024 full exact-geography rankings

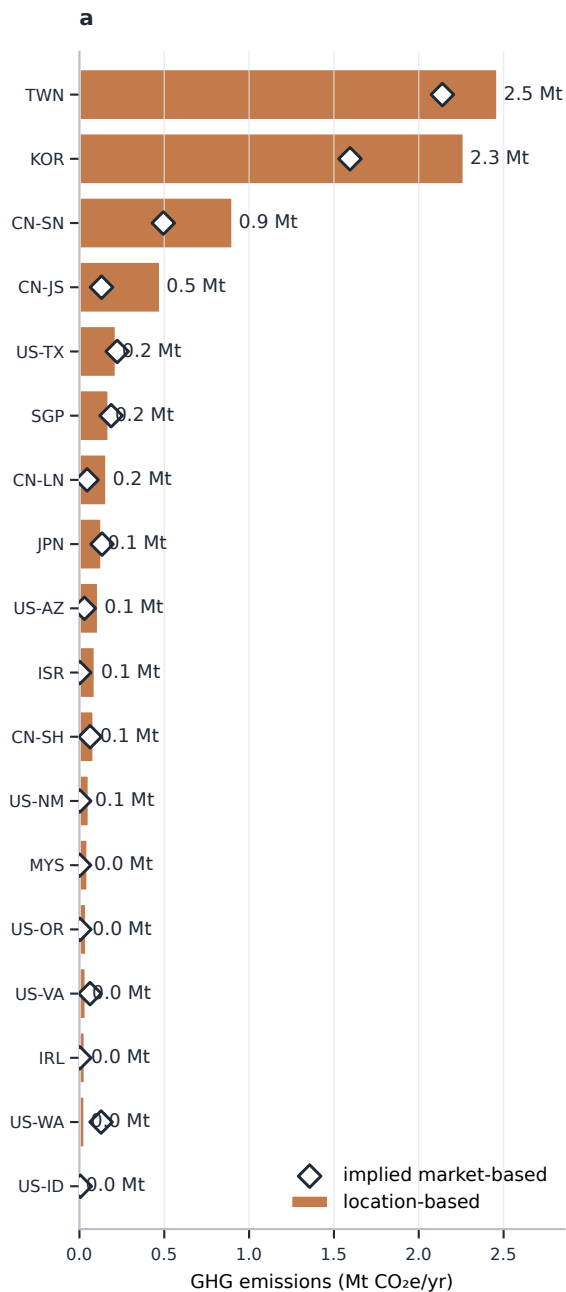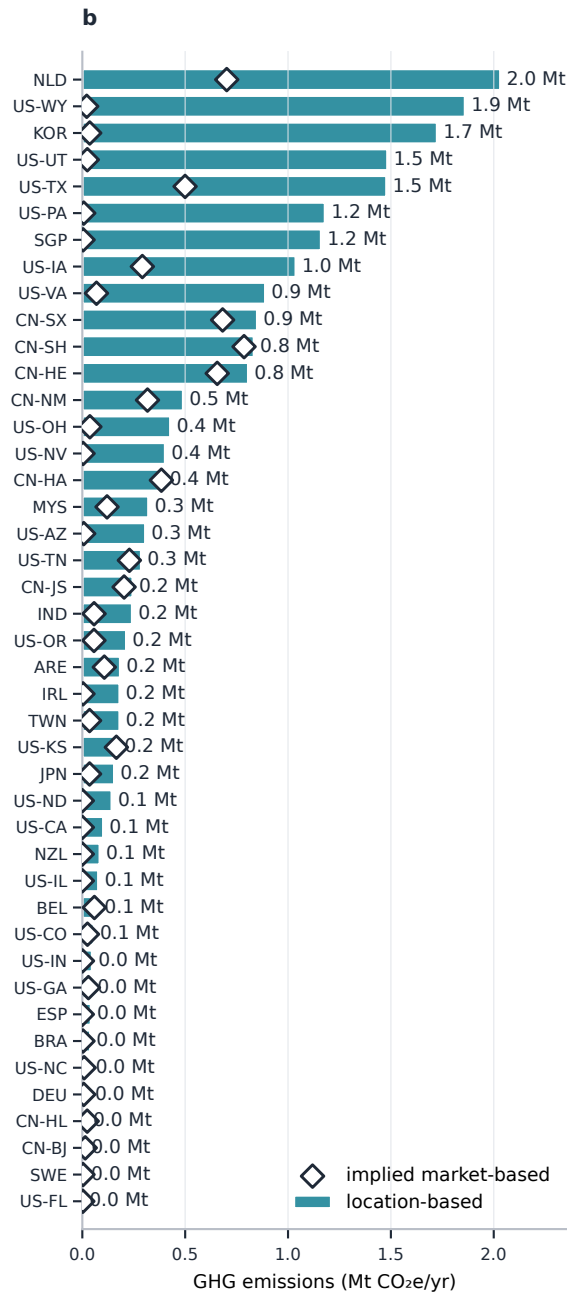

Supplement: Supplementary file 2 [file 9f330445ed9937f94f4c0d94.pdf]

**Figure 3b support | Product-family decomposition relocated from main panel**

**a**

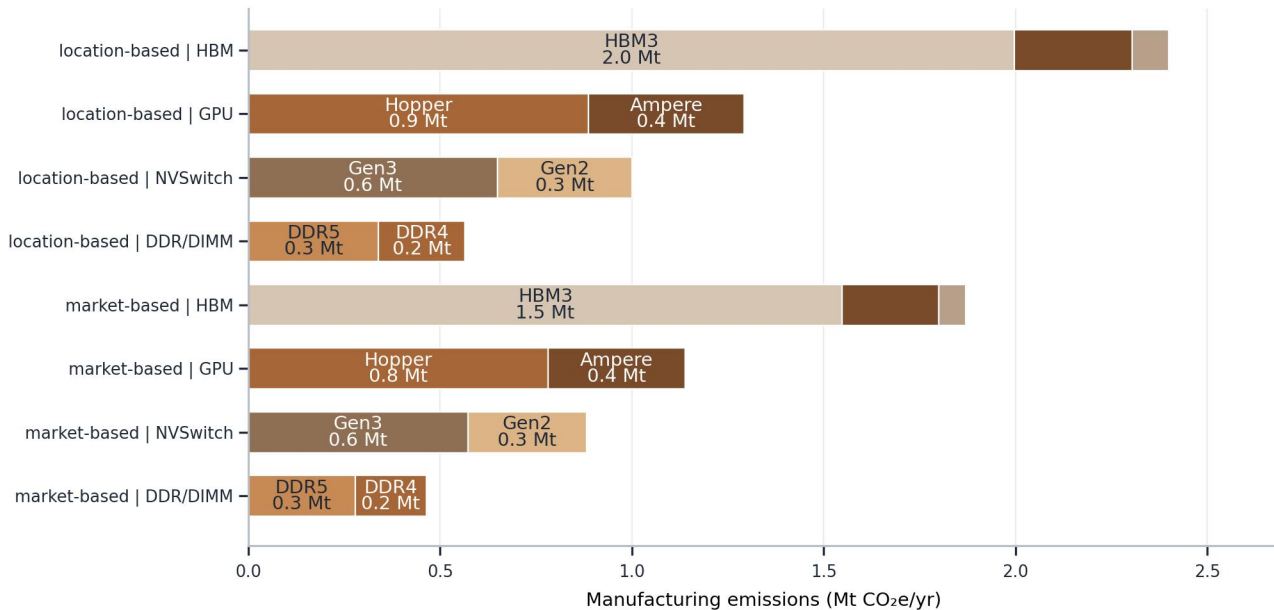

Supplement: Supplementary file 4 [file a7a59acfcddb350a88e8ba83.pdf]

**S-Figure 4 | 2024 operations facility LB/MB by company**

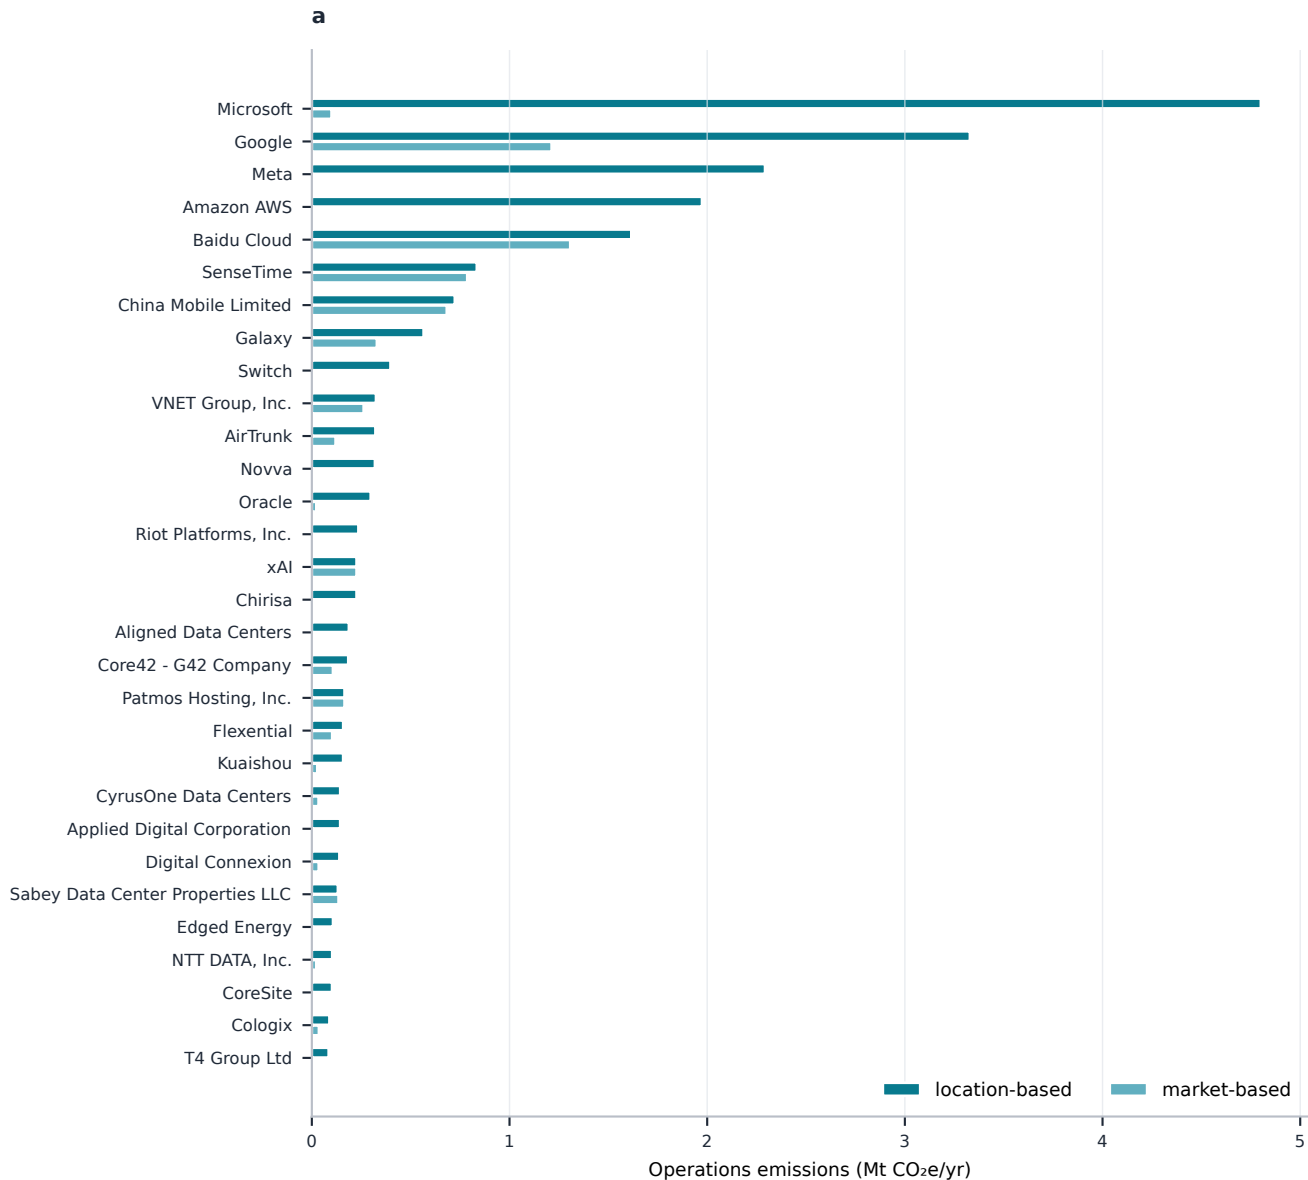

Supplement: Supplementary file 7 [file dc53e353597726f45d32020e.pdf]

S-Figure 5 | 2024 facility-level emission factor exposure distribution

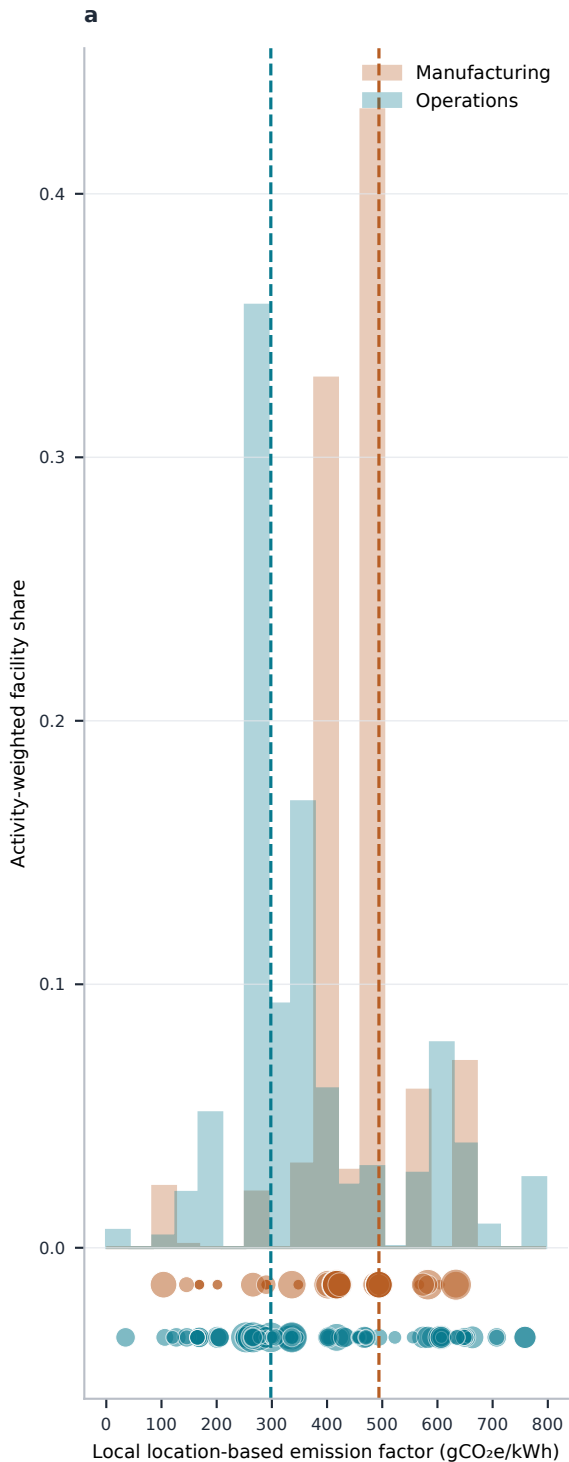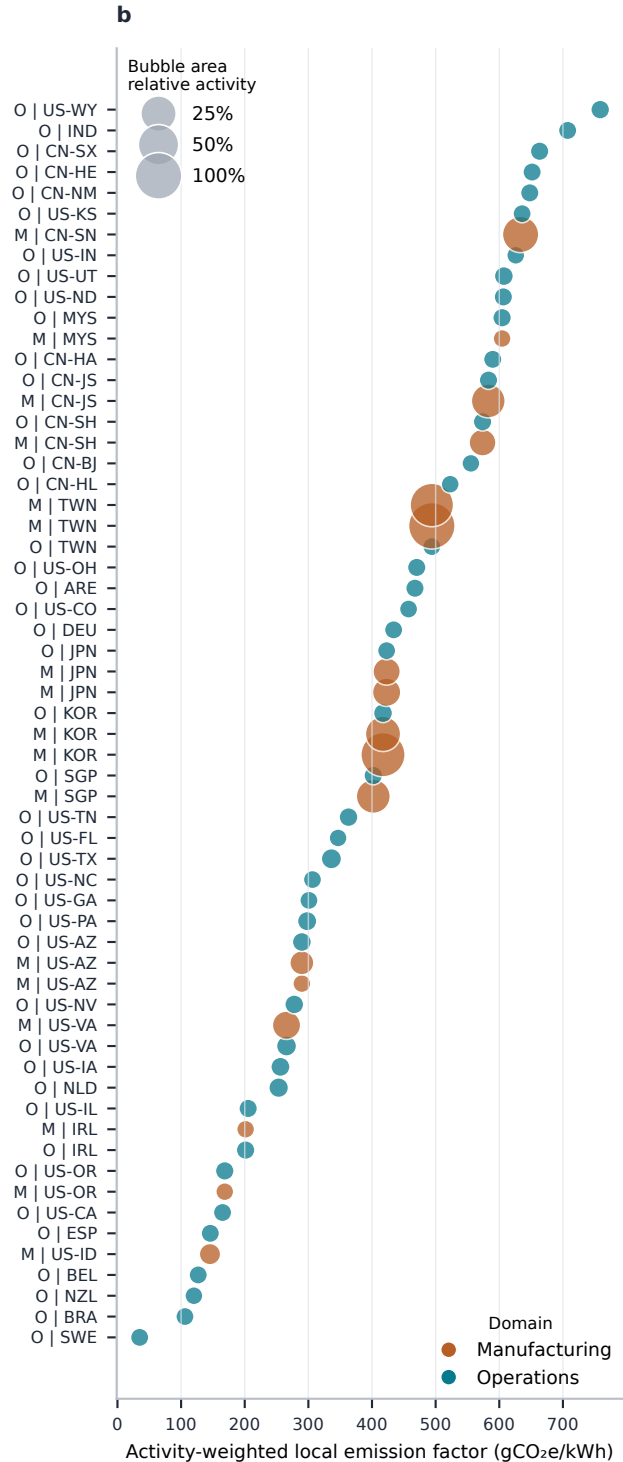

Supplement: Supplementary file 8 [file e58c9741902aeeb668e136cf.pdf]
